# Supplementary material for: Development of a high-density sub-species-specific targeted SNP assay for Rocky Mountain bighorn sheep (Ovis canadensis canadensis)
Source: PeerJ. 2024 Feb 26;12:e16946. doi: 10.7717/peerj.16946 (PMC10903336; doi:10.7717/peerj.16946)
Supplement: Supplemental Information 1 [file peerj-12-16946-s001.xlsx]

## Sheet: Sheet1
Chromosome	Target_start_position(bp)	Target_end_position(bp)	Target_Name	Number_Probes_Required	Number_Probes_Designed	Percent_Tiles_With_Probe
chr1	96120	96124	Mil2013_RM|chr1_96122	2	2	100
chr1	129143	129147	Mil2013_NBR|chr1_129145	2	2	100
chr1	161286	161290	Kar2015|chr1_161288	2	2	100
chr1	218057	218061	Mil2013_RM|chr1_218059	2	2	100
chr1	393899	393903	Mil2015|chr1_393901	2	2	100
chr1	405289	405293	Mil2015|chr1_405291	2	2	100
chr1	472569	472573	Mil2015|chr1_472571	2	2	100
chr1	502299	502303	Mil2013_NBR|chr1_502301	2	2	100
chr1	548394	548398	Kar2015|chr1_548396	2	2	100
chr1	559092	559096	Mil2013_NBR|chr1_559094	2	2	100
chr1	911939	911943	Kar2015|chr1_911941	2	2	100
chr1	1187333	1187337	Mil2013_shared|chr1_1187335	2	2	100
chr1	1577640	1577644	Mil2013_RM|chr1_1577642	2	2	100
chr1	1626530	1626534	Mil2013_shared|chr1_1626532	2	2	100
chr1	1688724	1688728	Mil2013_shared|chr1_1688726	2	2	100
chr1	1730868	1730872	Kar2015|chr1_1730870	2	2	100
chr1	1846358	1846362	Mil2015|chr1_1846360	2	2	100
chr1	1898133	1898137	Mil2013_shared|chr1_1898135	2	2	100
chr1	1996696	1996700	Kar2015|chr1_1996698	2	2	100
chr1	2103618	2103622	Mil2013_shared|chr1_2103620	2	2	100
chr1	2170511	2170515	Mil2013_shared|chr1_2170513	2	2	100
chr1	2353309	2353313	Kar2015|chr1_2353311	2	2	100
chr1	2368967	2368971	Mil2015|chr1_2368969	2	2	100
chr1	2642290	2642294	Kar2015|chr1_2642292	2	2	100
chr1	2671623	2671627	Mil2013_RM|chr1_2671625	2	2	100
chr1	2859613	2859617	Kar2015|chr1_2859615	2	2	100
chr1	2864610	2864614	Mil2013_NBR|chr1_2864612	2	2	100
chr1	3039181	3039185	Mil2013_NBR|chr1_3039183	2	2	100
chr1	3138884	3138888	Kar2015|chr1_3138886	2	2	100
chr1	3206425	3206429	Mil2013_RM|chr1_3206427	2	2	100
chr1	3237987	3237991	Kar2015|chr1_3237989	2	2	100
chr1	3259337	3259341	Kar2015|chr1_3259339	2	2	100
chr1	3266783	3266787	Mil2015|chr1_3266785	2	2	100
chr1	3511647	3511651	Mil2015|chr1_3511649	2	2	100
chr1	3583856	3583860	Kar2015|chr1_3583858	2	2	100
chr1	3623376	3623380	Mil2015|chr1_3623378	2	2	100
chr1	3627904	3627908	Kar2015|chr1_3627906	2	2	100
chr1	3762699	3762703	Mil2013_NBR|chr1_3762701	2	2	100
chr1	3891812	3891816	Kar2015|chr1_3891814	2	2	100
chr1	3934520	3934524	Kar2015|chr1_3934522	2	2	100
chr1	3968850	3968854	Kar2015|chr1_3968852	2	2	100
chr1	4018752	4018756	Kar2015|chr1_4018754	2	2	100
chr1	4070929	4070933	Kar2015|chr1_4070931	2	2	100
chr1	4092916	4092920	Mil2013_shared|chr1_4092918	2	2	100
chr1	4138482	4138486	Mil2015|chr1_4138484	2	2	100
chr1	4164061	4164065	Kar2015|chr1_4164063	2	2	100
chr1	4407526	4407530	Kar2015|chr1_4407528	2	2	100
chr1	4506821	4506825	Kar2015|chr1_4506823	2	2	100
chr1	4565996	4566000	Mil2015|chr1_4565998	2	2	100
chr1	4616860	4616864	Kar2015|chr1_4616862	2	2	100
chr1	4667797	4667801	Mil2015|chr1_4667799	2	2	100
chr1	4793825	4793829	Mil2015|chr1_4793827	2	2	100
chr1	4871099	4871103	Mil2015|chr1_4871101	2	2	100
chr1	5034380	5034384	Kar2015|chr1_5034382	2	2	100
chr1	5063999	5064003	Kar2015|chr1_5064001	2	2	100
chr1	5124854	5124858	Mil2015|chr1_5124856	2	2	100
chr1	5170676	5170680	Mil2013_NBR|chr1_5170678	2	2	100
chr1	5182358	5182362	Kar2015|chr1_5182360	2	2	100
chr1	5276265	5276269	Mil2015|chr1_5276267	2	2	100
chr1	5441724	5441728	Mil2015|chr1_5441726	2	2	100
chr1	5639219	5639223	Kar2015|chr1_5639221	2	2	100
chr1	5720642	5720646	Mil2015|chr1_5720644	2	2	100
chr1	5907627	5907631	Kar2015|chr1_5907629	2	2	100
chr1	6042494	6042498	Mil2013_shared|chr1_6042496	2	2	100
chr1	6078226	6078230	Kar2015|chr1_6078228	2	2	100
chr1	6146804	6146808	Kar2015|chr1_6146806	2	2	100
chr1	6359688	6359692	Mil2015|chr1_6359690	2	2	100
chr1	6379163	6379167	Mil2015|chr1_6379165	2	2	100
chr1	6607870	6607874	Mil2015|chr1_6607872	2	2	100
chr1	6655517	6655521	Mil2015|chr1_6655519	2	2	100
chr1	6808800	6808804	Mil2015|chr1_6808802	2	2	100
chr1	6823071	6823075	Kar2015|chr1_6823073	2	2	100
chr1	6834402	6834406	Mil2013_NBR|chr1_6834404	2	2	100
chr1	6873745	6873749	Mil2015|chr1_6873747	2	2	100
chr1	6943024	6943028	Kar2015|chr1_6943026	2	2	100
chr1	7040779	7040783	Mil2013_NBR|chr1_7040781	2	2	100
chr1	7068234	7068238	Mil2015|chr1_7068236	2	2	100
chr1	7209922	7209926	Mil2015|chr1_7209924	2	2	100
chr1	7216762	7216766	Mil2015|chr1_7216764	2	2	100
chr1	7239215	7239219	Mil2015|chr1_7239217	2	2	100
chr1	7262071	7262075	Kar2015|chr1_7262073	2	2	100
chr1	7265980	7265984	Mil2015|chr1_7265982	2	2	100
chr1	7271056	7271060	Mil2015|chr1_7271058	2	2	100
chr1	7298654	7298658	Mil2013_NBR|chr1_7298656	2	2	100
chr1	7369138	7369142	Mil2015|chr1_7369140	2	2	100
chr1	7448679	7448683	Mil2015|chr1_7448681	2	2	100
chr1	7463585	7463589	Mil2015|chr1_7463587	2	2	100
chr1	7552853	7552857	Kar2015|chr1_7552855	2	2	100
chr1	7580564	7580568	Mil2013_NBR|chr1_7580566	2	2	100
chr1	7594487	7594491	Mil2015|chr1_7594489	2	2	100
chr1	7650364	7650368	Mil2015|chr1_7650366	2	2	100
chr1	7678701	7678705	Mil2018|chr1_7678703	2	2	100
chr1	7727756	7727760	Kar2015|chr1_7727758	2	2	100
chr1	7901251	7901255	Kar2015|chr1_7901253	2	2	100
chr1	7923158	7923162	Kar2015|chr1_7923160	2	2	100
chr1	7940179	7940183	Mil2015|chr1_7940181	2	2	100
chr1	7953936	7953940	Mil2015|chr1_7953938	2	2	100
chr1	7957734	7957738	Kar2015|chr1_7957736	2	2	100
chr1	7968555	7968559	Kar2015|chr1_7968557	2	2	100
chr1	7989669	7989673	Mil2015|chr1_7989671	2	2	100
chr1	8008384	8008388	Mil2015|chr1_8008386	2	2	100
chr1	8084639	8084643	Kar2015|chr1_8084641	2	2	100
chr1	8340832	8340836	Mil2015|chr1_8340834	2	2	100
chr1	8362794	8362798	Mil2015|chr1_8362796	2	2	100
chr1	8461500	8461504	Mil2015|chr1_8461502	2	2	100
chr1	8477483	8477487	Mil2013_shared|chr1_8477485	2	2	100
chr1	8486523	8486527	Mil2015|chr1_8486525	2	2	100
chr1	8532986	8532990	Kar2015|chr1_8532988	2	2	100
chr1	8605685	8605689	Kar2015|chr1_8605687	2	2	100
chr1	8661181	8661185	Kar2015|chr1_8661183	2	2	100
chr1	8995084	8995088	Kar2015|chr1_8995086	2	2	100
chr1	9062668	9062672	Mil2015|chr1_9062670	2	2	100
chr1	9185057	9185061	Mil2015|chr1_9185059	2	2	100
chr1	9220251	9220255	Mil2015|chr1_9220253	2	2	100
chr1	9300963	9300967	Kar2015|chr1_9300965	2	2	100
chr1	9416631	9416635	Mil2015|chr1_9416633	2	2	100
chr1	9573043	9573047	Mil2015|chr1_9573045	2	2	100
chr1	9696208	9696212	Mil2013_NBR|chr1_9696210	2	2	100
chr1	9718342	9718346	Kar2015|chr1_9718344	2	2	100
chr1	9732030	9732034	Kar2015|chr1_9732032	2	2	100
chr1	9808754	9808758	Mil2013_shared|chr1_9808756	2	2	100
chr1	9836975	9836979	Mil2015|chr1_9836977	2	2	100
chr1	9880159	9880163	Mil2015|chr1_9880161	2	2	100
chr1	9907871	9907875	Mil2015|chr1_9907873	2	2	100
chr1	9932381	9932385	Mil2015|chr1_9932383	2	2	100
chr1	9941719	9941723	Mil2015|chr1_9941721	2	2	100
chr1	9957426	9957430	Kar2015|chr1_9957428	2	2	100
chr1	9976175	9976179	Mil2015|chr1_9976177	2	2	100
chr1	10008212	10008216	Mil2015|chr1_10008214	2	2	100
chr1	10055239	10055243	Mil2015|chr1_10055241	2	2	100
chr1	10104533	10104537	Kar2015|chr1_10104535	2	2	100
chr1	10108306	10108310	Mil2015|chr1_10108308	2	2	100
chr1	10169955	10169959	Mil2018|chr1_10169957	2	2	100
chr1	10290019	10290023	Mil2015|chr1_10290021	2	2	100
chr1	10331054	10331058	Kar2015|chr1_10331056	2	2	100
chr1	10343932	10343936	Mil2015|chr1_10343934	2	2	100
chr1	10384325	10384329	Kar2015|chr1_10384327	2	2	100
chr1	10475041	10475045	Mil2015|chr1_10475043	2	2	100
chr1	10485685	10485689	Mil2015|chr1_10485687	2	2	100
chr1	10624600	10624604	Mil2015|chr1_10624602	2	2	100
chr1	10707960	10707964	Mil2015|chr1_10707962	2	2	100
chr1	10746985	10746989	Mil2015|chr1_10746987	2	2	100
chr1	10760749	10760753	Mil2015|chr1_10760751	2	2	100
chr1	10817728	10817732	Kar2015|chr1_10817730	2	2	100
chr1	10878314	10878318	Kar2015|chr1_10878316	2	2	100
chr1	10926011	10926015	Kar2015|chr1_10926013	2	2	100
chr1	10935735	10935739	Kar2015|chr1_10935737	2	2	100
chr1	11019675	11019679	Kar2015|chr1_11019677	2	2	100
chr1	11044042	11044046	Mil2015|chr1_11044044	2	2	100
chr1	11060254	11060258	Mil2013_shared|chr1_11060256	2	2	100
chr1	11141578	11141582	Kar2015|chr1_11141580	2	2	100
chr1	11293374	11293378	Kar2015|chr1_11293376	2	2	100
chr1	11377784	11377788	Mil2013_RM|chr1_11377786	2	2	100
chr1	11399085	11399089	Mil2015|chr1_11399087	2	2	100
chr1	11445773	11445777	Mil2013_shared|chr1_11445775	2	2	100
chr1	11661870	11661874	Kar2015|chr1_11661872	2	2	100
chr1	11696476	11696480	Mil2015|chr1_11696478	2	2	100
chr1	11715726	11715730	Kar2015|chr1_11715728	2	2	100
chr1	11884674	11884678	Mil2015|chr1_11884676	2	2	100
chr1	11928439	11928443	Mil2015|chr1_11928441	2	2	100
chr1	11958418	11958422	Kar2015|chr1_11958420	2	2	100
chr1	11965694	11965698	Mil2013_shared|chr1_11965696	2	2	100
chr1	12018016	12018020	Kar2015|chr1_12018018	2	2	100
chr1	12028242	12028246	Mil2015|chr1_12028244	2	2	100
chr1	12057659	12057663	Mil2013_shared|chr1_12057661	2	2	100
chr1	12112122	12112126	Mil2015|chr1_12112124	2	2	100
chr1	12135121	12135125	Kar2015|chr1_12135123	2	2	100
chr1	12161539	12161543	Kar2015|chr1_12161541	2	2	100
chr1	12188098	12188102	Mil2015|chr1_12188100	2	2	100
chr1	12215139	12215143	Mil2013_NBR|chr1_12215141	2	2	100
chr1	12369254	12369258	Mil2013_shared|chr1_12369256	2	2	100
chr1	12415079	12415083	Kar2015|chr1_12415081	2	2	100
chr1	12566762	12566766	Kar2015|chr1_12566764	2	2	100
chr1	12605680	12605684	Kar2015|chr1_12605682	2	2	100
chr1	12627176	12627180	Kar2015|chr1_12627178	2	2	100
chr1	12694296	12694300	Mil2015|chr1_12694298	2	2	100
chr1	12727907	12727911	Mil2015|chr1_12727909	2	2	100
chr1	12778810	12778814	Mil2015|chr1_12778812	2	2	100
chr1	12816823	12816827	Kar2015|chr1_12816825	2	2	100
chr1	12858870	12858874	Mil2015|chr1_12858872	2	2	100
chr1	12869648	12869652	Kar2015|chr1_12869650	2	2	100
chr1	12977963	12977967	Mil2015|chr1_12977965	2	2	100
chr1	13044366	13044370	Kar2015|chr1_13044368	2	2	100
chr1	13110515	13110519	Mil2015|chr1_13110517	2	2	100
chr1	13121461	13121465	Kar2015|chr1_13121463	2	2	100
chr1	13135428	13135432	Mil2015|chr1_13135430	2	2	100
chr1	13177616	13177620	Mil2015|chr1_13177618	2	2	100
chr1	13229606	13229610	Kar2015|chr1_13229608	2	2	100
chr1	13287886	13287890	Mil2015|chr1_13287888	2	2	100
chr1	13314637	13314641	Kar2015|chr1_13314639	2	2	100
chr1	13416933	13416937	Mil2015|chr1_13416935	2	2	100
chr1	13427508	13427512	Kar2015|chr1_13427510	2	2	100
chr1	13485647	13485651	Kar2015|chr1_13485649	2	2	100
chr1	13581730	13581734	Mil2015|chr1_13581732	2	2	100
chr1	13619560	13619564	Kar2015|chr1_13619562	2	2	100
chr1	13632040	13632044	Mil2015|chr1_13632042	2	2	100
chr1	13635960	13635964	Kar2015|chr1_13635962	2	2	100
chr1	13652164	13652168	Mil2015|chr1_13652166	2	2	100
chr1	13693683	13693687	Mil2015|chr1_13693685	2	2	100
chr1	13723859	13723863	Kar2015|chr1_13723861	2	2	100
chr1	13768207	13768211	Kar2015|chr1_13768209	2	2	100
chr1	13786402	13786406	Mil2015|chr1_13786404	2	2	100
chr1	13821867	13821871	Kar2015|chr1_13821869	2	2	100
chr1	13825722	13825726	Kar2015|chr1_13825724	2	2	100
chr1	13830731	13830735	Mil2018|chr1_13830733	2	2	100
chr1	13852192	13852196	Kar2015|chr1_13852194	2	2	100
chr1	13866335	13866339	Mil2013_shared|chr1_13866337	2	2	100
chr1	13873043	13873047	Mil2013_RM|chr1_13873045	2	2	100
chr1	13964310	13964314	Mil2015|chr1_13964312	2	2	100
chr1	13977057	13977061	Mil2015|chr1_13977059	2	2	100
chr1	14030186	14030190	Kar2015|chr1_14030188	2	2	100
chr1	14039965	14039969	Kar2015|chr1_14039967	2	2	100
chr1	14088477	14088481	Mil2015|chr1_14088479	2	2	100
chr1	14150095	14150099	Mil2015|chr1_14150097	2	2	100
chr1	14187391	14187395	Kar2015|chr1_14187393	2	2	100
chr1	14194913	14194917	Kar2015|chr1_14194915	2	2	100
chr1	14230800	14230804	Kar2015|chr1_14230802	2	2	100
chr1	14241270	14241274	Kar2015|chr1_14241272	2	2	100
chr1	14247629	14247633	Mil2015|chr1_14247631	2	2	100
chr1	14266876	14266880	Kar2015|chr1_14266878	2	2	100
chr1	14323066	14323070	Mil2015|chr1_14323068	2	2	100
chr1	14390783	14390787	Mil2015|chr1_14390785	2	2	100
chr1	14394867	14394871	Kar2015|chr1_14394869	2	2	100
chr1	14423826	14423830	Mil2015|chr1_14423828	2	2	100
chr1	14475192	14475196	Kar2015|chr1_14475194	2	2	100
chr1	14552909	14552913	Kar2015|chr1_14552911	2	2	100
chr1	14696977	14696981	Mil2015|chr1_14696979	2	2	100
chr1	14721457	14721461	Kar2015|chr1_14721459	2	2	100
chr1	14748288	14748292	Kar2015|chr1_14748290	2	2	100
chr1	14755037	14755041	Mil2015|chr1_14755039	2	2	100
chr1	14768454	14768458	Kar2015|chr1_14768456	2	2	100
chr1	14923949	14923953	Kar2015|chr1_14923951	2	2	100
chr1	14996224	14996228	Kar2015|chr1_14996226	2	2	100
chr1	15021164	15021168	Kar2015|chr1_15021166	2	2	100
chr1	15028552	15028556	Kar2015|chr1_15028554	2	2	100
chr1	15060538	15060542	Mil2015|chr1_15060540	2	2	100
chr1	15077227	15077231	Mil2015|chr1_15077229	2	2	100
chr1	15149115	15149119	Kar2015|chr1_15149117	2	2	100
chr1	15239438	15239442	Mil2013_NBR|chr1_15239440	2	2	100
chr1	15283020	15283024	Kar2015|chr1_15283022	2	2	100
chr1	15423412	15423416	Mil2015|chr1_15423414	2	2	100
chr1	15447917	15447921	Kar2015|chr1_15447919	2	2	100
chr1	15475698	15475702	Mil2015|chr1_15475700	2	2	100
chr1	15511821	15511825	Mil2018|chr1_15511823	2	2	100
chr1	15528987	15528991	Mil2015|chr1_15528989	2	2	100
chr1	15573473	15573477	Kar2015|chr1_15573475	2	2	100
chr1	15659960	15659964	Kar2015|chr1_15659962	2	2	100
chr1	15733147	15733151	Kar2015|chr1_15733149	2	2	100
chr1	15832604	15832608	Mil2013_RM|chr1_15832606	2	2	100
chr1	15851446	15851450	Kar2015|chr1_15851448	2	2	100
chr1	15865311	15865315	Kar2015|chr1_15865313	2	2	100
chr1	15996577	15996581	Mil2013_RM|chr1_15996579	2	2	100
chr1	16036312	16036316	Kar2015|chr1_16036314	2	2	100
chr1	16099545	16099549	Kar2015|chr1_16099547	2	2	100
chr1	16170993	16170997	Mil2015|chr1_16170995	2	2	100
chr1	16212613	16212617	Kar2015|chr1_16212615	2	2	100
chr1	16252777	16252781	Mil2015|chr1_16252779	2	2	100
chr1	16279823	16279827	Kar2015|chr1_16279825	2	2	100
chr1	16492766	16492770	Kar2015|chr1_16492768	2	2	100
chr1	16504376	16504380	Mil2015|chr1_16504378	2	2	100
chr1	16559301	16559305	Mil2015|chr1_16559303	2	2	100
chr1	16596736	16596740	Kar2015|chr1_16596738	2	2	100
chr1	16606351	16606355	Mil2015|chr1_16606353	2	2	100
chr1	17049162	17049166	Mil2013_NBR|chr1_17049164	2	2	100
chr1	17166502	17166506	Mil2015|chr1_17166504	2	2	100
chr1	17196857	17196861	Mil2015|chr1_17196859	2	2	100
chr1	17217441	17217445	Mil2018|chr1_17217443	2	2	100
chr1	17283241	17283245	Mil2013_RM|chr1_17283243	2	2	100
chr1	17339344	17339348	Kar2015|chr1_17339346	2	2	100
chr1	17614112	17614116	Kar2015|chr1_17614114	2	2	100
chr1	17666106	17666110	Mil2013_shared|chr1_17666108	2	2	100
chr1	17687970	17687974	Kar2015|chr1_17687972	2	2	100
chr1	17722182	17722186	Kar2015|chr1_17722184	2	2	100
chr1	17948414	17948418	Kar2015|chr1_17948416	2	2	100
chr1	18326437	18326441	Kar2015|chr1_18326439	2	2	100
chr1	18404829	18404833	Kar2015|chr1_18404831	2	2	100
chr1	18416576	18416580	Mil2013_shared|chr1_18416578	2	2	100
chr1	18470393	18470397	Kar2015|chr1_18470395	2	2	100
chr1	18491983	18491987	Kar2015|chr1_18491985	2	2	100
chr1	18659193	18659197	Kar2015|chr1_18659195	2	2	100
chr1	18721387	18721391	Mil2013_NBR|chr1_18721389	2	2	100
chr1	18831032	18831036	Kar2015|chr1_18831034	2	2	100
chr1	18903353	18903357	Mil2015|chr1_18903355	2	2	100
chr1	18929742	18929746	Mil2013_shared|chr1_18929744	2	2	100
chr1	18971593	18971597	Mil2015|chr1_18971595	2	2	100
chr1	19023247	19023251	Mil2015|chr1_19023249	2	2	100
chr1	19109160	19109164	Mil2015|chr1_19109162	2	2	100
chr1	19204083	19204087	Kar2015|chr1_19204085	2	2	100
chr1	19208941	19208945	Mil2013_shared|chr1_19208943	2	2	100
chr1	19228868	19228872	Kar2015|chr1_19228870	2	2	100
chr1	19234055	19234059	Mil2013_NBR|chr1_19234057	2	2	100
chr1	19304940	19304944	Kar2015|chr1_19304942	2	2	100
chr1	19324534	19324538	Mil2015|chr1_19324536	2	2	100
chr1	19330264	19330268	Mil2015|chr1_19330266	2	2	100
chr1	19350556	19350560	Mil2015|chr1_19350558	2	2	100
chr1	19429367	19429371	Kar2015|chr1_19429369	2	2	100
chr1	19568190	19568194	Kar2015|chr1_19568192	2	2	100
chr1	19604450	19604454	Mil2015|chr1_19604452	2	2	100
chr1	19655161	19655165	Mil2015|chr1_19655163	2	2	100
chr1	19700501	19700505	Mil2015|chr1_19700503	2	2	100
chr1	19714106	19714110	Mil2015|chr1_19714108	2	2	100
chr1	19755575	19755579	Kar2015|chr1_19755577	2	2	100
chr1	19759508	19759512	Mil2015|chr1_19759510	2	2	100
chr1	19765765	19765769	Kar2015|chr1_19765767	2	2	100
chr1	19776405	19776409	Mil2015|chr1_19776407	2	2	100
chr1	19789166	19789170	Mil2015|chr1_19789168	2	2	100
chr1	19802318	19802322	Mil2015|chr1_19802320	2	2	100
chr1	19841177	19841181	Kar2015|chr1_19841179	2	2	100
chr1	19878726	19878730	Kar2015|chr1_19878728	2	2	100
chr1	19908379	19908383	Mil2018|chr1_19908381	2	2	100
chr1	19967463	19967467	Kar2015|chr1_19967465	2	2	100
chr1	20049248	20049252	Mil2015|chr1_20049250	2	2	100
chr1	20116432	20116436	Mil2015|chr1_20116434	2	2	100
chr1	20207580	20207584	Mil2015|chr1_20207582	2	2	100
chr1	20238867	20238871	Mil2015|chr1_20238869	2	2	100
chr1	20256946	20256950	Mil2015|chr1_20256948	2	2	100
chr1	20274763	20274767	Kar2015|chr1_20274765	2	2	100
chr1	20327553	20327557	Mil2015|chr1_20327555	2	2	100
chr1	20431872	20431876	Kar2015|chr1_20431874	2	2	100
chr1	20494026	20494030	Mil2015|chr1_20494028	2	2	100
chr1	20502449	20502453	Kar2015|chr1_20502451	2	2	100
chr1	20530876	20530880	Kar2015|chr1_20530878	2	2	100
chr1	20910522	20910526	Mil2015|chr1_20910524	2	2	100
chr1	20922111	20922115	Mil2015|chr1_20922113	2	2	100
chr1	20941489	20941493	Mil2015|chr1_20941491	2	2	100
chr1	20959728	20959732	Mil2015|chr1_20959730	2	2	100
chr1	20986175	20986179	Mil2015|chr1_20986177	2	2	100
chr1	21007605	21007609	Mil2015|chr1_21007607	2	2	100
chr1	21026336	21026340	Mil2015|chr1_21026338	2	2	100
chr1	21165099	21165103	Mil2015|chr1_21165101	2	2	100
chr1	21169861	21169865	Mil2015|chr1_21169863	2	2	100
chr1	21174039	21174043	Mil2015|chr1_21174041	2	2	100
chr1	21241704	21241708	Mil2015|chr1_21241706	2	2	100
chr1	21290211	21290215	Mil2015|chr1_21290213	2	2	100
chr1	21461097	21461101	Kar2015|chr1_21461099	2	2	100
chr1	21495976	21495980	Kar2015|chr1_21495978	2	2	100
chr1	21614688	21614692	Kar2015|chr1_21614690	2	2	100
chr1	21649889	21649893	Mil2015|chr1_21649891	2	2	100
chr1	21701751	21701755	Mil2013_NBR|chr1_21701753	2	2	100
chr1	21728944	21728948	Kar2015|chr1_21728946	2	2	100
chr1	21855962	21855966	Mil2013_RM|chr1_21855964	2	2	100
chr1	21869422	21869426	Mil2015|chr1_21869424	2	2	100
chr1	21902836	21902840	Mil2015|chr1_21902838	2	2	100
chr1	21953757	21953761	Kar2015|chr1_21953759	2	2	100
chr1	22062947	22062951	Mil2013_shared|chr1_22062949	2	2	100
chr1	22067629	22067633	Mil2013_RM|chr1_22067631	2	2	100
chr1	22095904	22095908	Mil2015|chr1_22095906	2	2	100
chr1	22102405	22102409	Kar2015|chr1_22102407	2	2	100
chr1	22145395	22145399	Mil2015|chr1_22145397	2	2	100
chr1	22180714	22180718	Mil2013_NBR|chr1_22180716	2	2	100
chr1	22336773	22336777	Kar2015|chr1_22336775	2	2	100
chr1	22560872	22560876	Mil2015|chr1_22560874	2	2	100
chr1	22577172	22577176	Mil2015|chr1_22577174	2	2	100
chr1	22603943	22603947	Kar2015|chr1_22603945	2	2	100
chr1	22627101	22627105	Mil2015|chr1_22627103	2	2	100
chr1	22832302	22832306	Mil2015|chr1_22832304	2	2	100
chr1	22884510	22884514	Mil2015|chr1_22884512	2	2	100
chr1	22917887	22917891	Mil2015|chr1_22917889	2	2	100
chr1	22927920	22927924	Mil2015|chr1_22927922	2	2	100
chr1	22948666	22948670	Mil2015|chr1_22948668	2	2	100
chr1	22959126	22959130	Kar2015|chr1_22959128	2	2	100
chr1	23031390	23031394	Mil2013_RM|chr1_23031392	2	2	100
chr1	23038227	23038231	Kar2015|chr1_23038229	2	2	100
chr1	23139109	23139113	Mil2013_RM|chr1_23139111	2	2	100
chr1	23239905	23239909	Kar2015|chr1_23239907	2	2	100
chr1	23243687	23243691	Mil2015|chr1_23243689	2	2	100
chr1	23248085	23248089	Mil2015|chr1_23248087	2	2	100
chr1	23259647	23259651	Kar2015|chr1_23259649	2	2	100
chr1	23264000	23264004	Kar2015|chr1_23264002	2	2	100
chr1	23302531	23302535	Mil2015|chr1_23302533	2	2	100
chr1	23319217	23319221	Kar2015|chr1_23319219	2	2	100
chr1	23348966	23348970	Mil2013_shared|chr1_23348968	2	2	100
chr1	23497808	23497812	Mil2015|chr1_23497810	2	2	100
chr1	23534943	23534947	Mil2015|chr1_23534945	2	2	100
chr1	23546708	23546712	Kar2015|chr1_23546710	2	2	100
chr1	23615282	23615286	Mil2015|chr1_23615284	2	2	100
chr1	23683972	23683976	Mil2015|chr1_23683974	2	2	100
chr1	23737285	23737289	Mil2015|chr1_23737287	2	2	100
chr1	23765960	23765964	Mil2015|chr1_23765962	2	2	100
chr1	23793183	23793187	Mil2015|chr1_23793185	2	2	100
chr1	23804788	23804792	Mil2015|chr1_23804790	2	2	100
chr1	24241125	24241129	Mil2015|chr1_24241127	2	2	100
chr1	24254864	24254868	Mil2015|chr1_24254866	2	2	100
chr1	24297754	24297758	Mil2015|chr1_24297756	2	2	100
chr1	24342785	24342789	Kar2015|chr1_24342787	2	2	100
chr1	24349204	24349208	Kar2015|chr1_24349206	2	2	100
chr1	24363366	24363370	Mil2015|chr1_24363368	2	2	100
chr1	24399980	24399984	Mil2015|chr1_24399982	2	2	100
chr1	24417505	24417509	Mil2013_NBR|chr1_24417507	2	2	100
chr1	24453576	24453580	Kar2015|chr1_24453578	2	2	100
chr1	24457474	24457478	Kar2015|chr1_24457476	2	2	100
chr1	24472293	24472297	Mil2015|chr1_24472295	2	2	100
chr1	24482056	24482060	Kar2015|chr1_24482058	2	2	100
chr1	24560352	24560356	Mil2015|chr1_24560354	2	2	100
chr1	24566738	24566742	Kar2015|chr1_24566740	2	2	100
chr1	24708507	24708511	Kar2015|chr1_24708509	2	2	100
chr1	24775346	24775350	Mil2015|chr1_24775348	2	2	100
chr1	24860712	24860716	Kar2015|chr1_24860714	2	2	100
chr1	24883654	24883658	Kar2015|chr1_24883656	2	2	100
chr1	24906766	24906770	Mil2015|chr1_24906768	2	2	100
chr1	24920377	24920381	Mil2015|chr1_24920379	2	2	100
chr1	24938596	24938600	Kar2015|chr1_24938598	2	2	100
chr1	24962117	24962121	Mil2015|chr1_24962119	2	2	100
chr1	25002609	25002613	Mil2015|chr1_25002611	2	2	100
chr1	25020320	25020324	Kar2015|chr1_25020322	2	2	100
chr1	25040691	25040695	Kar2015|chr1_25040693	2	2	100
chr1	25057926	25057930	Kar2015|chr1_25057928	2	2	100
chr1	25199075	25199079	Mil2015|chr1_25199077	2	2	100
chr1	25215108	25215112	Kar2015|chr1_25215110	2	2	100
chr1	25401226	25401230	Mil2015|chr1_25401228	2	2	100
chr1	25599060	25599064	Kar2015|chr1_25599062	2	2	100
chr1	25751431	25751435	Kar2015|chr1_25751433	2	2	100
chr1	25901364	25901368	Mil2015|chr1_25901366	2	2	100
chr1	25908935	25908939	Mil2015|chr1_25908937	2	2	100
chr1	25926654	25926658	Mil2015|chr1_25926656	2	2	100
chr1	25963554	25963558	Mil2015|chr1_25963556	2	2	100
chr1	26005983	26005987	Mil2015|chr1_26005985	2	2	100
chr1	26044499	26044503	Mil2015|chr1_26044501	2	2	100
chr1	26084225	26084229	Mil2015|chr1_26084227	2	2	100
chr1	26163139	26163143	Mil2015|chr1_26163141	2	2	100
chr1	26184801	26184805	Mil2015|chr1_26184803	2	2	100
chr1	26198974	26198978	Mil2015|chr1_26198976	2	2	100
chr1	26262201	26262205	Mil2015|chr1_26262203	2	2	100
chr1	26302689	26302693	Mil2015|chr1_26302691	2	2	100
chr1	26376473	26376477	Kar2015|chr1_26376475	2	2	100
chr1	26410227	26410231	Mil2015|chr1_26410229	2	2	100
chr1	26439007	26439011	Kar2015|chr1_26439009	2	2	100
chr1	26474726	26474730	Mil2015|chr1_26474728	2	2	100
chr1	26489497	26489501	Mil2015|chr1_26489499	2	2	100
chr1	26504941	26504945	Mil2015|chr1_26504943	2	2	100
chr1	26521234	26521238	Kar2015|chr1_26521236	2	2	100
chr1	26535775	26535779	Kar2015|chr1_26535777	2	2	100
chr1	26622232	26622236	Mil2015|chr1_26622234	2	2	100
chr1	26655662	26655666	Mil2015|chr1_26655664	2	2	100
chr1	26660453	26660457	Mil2015|chr1_26660455	2	2	100
chr1	26695997	26696001	Mil2015|chr1_26695999	2	2	100
chr1	26729786	26729790	Mil2015|chr1_26729788	2	2	100
chr1	26886780	26886784	Mil2015|chr1_26886782	2	2	100
chr1	26944516	26944520	Mil2015|chr1_26944518	2	2	100
chr1	26954836	26954840	Mil2015|chr1_26954838	2	2	100
chr1	26966756	26966760	Mil2015|chr1_26966758	2	2	100
chr1	27062720	27062724	Mil2013_NBR|chr1_27062722	2	2	100
chr1	27074271	27074275	Kar2015|chr1_27074273	2	2	100
chr1	27102734	27102738	Kar2015|chr1_27102736	2	2	100
chr1	27256201	27256205	Mil2015|chr1_27256203	2	2	100
chr1	27293884	27293888	Mil2015|chr1_27293886	2	2	100
chr1	27302837	27302841	Mil2013_shared|chr1_27302839	2	2	100
chr1	27332336	27332340	Mil2015|chr1_27332338	2	2	100
chr1	27453059	27453063	Mil2015|chr1_27453061	2	2	100
chr1	27461097	27461101	Kar2015|chr1_27461099	2	2	100
chr1	27523973	27523977	Mil2015|chr1_27523975	2	2	100
chr1	27549772	27549776	Mil2013_shared|chr1_27549774	2	2	100
chr1	27631296	27631300	Mil2015|chr1_27631298	2	2	100
chr1	27687663	27687667	Kar2015|chr1_27687665	2	2	100
chr1	27782762	27782766	Kar2015|chr1_27782764	2	2	100
chr1	27795141	27795145	Kar2015|chr1_27795143	2	2	100
chr1	27805159	27805163	Kar2015|chr1_27805161	2	2	100
chr1	28046423	28046427	Mil2015|chr1_28046425	2	2	100
chr1	28068935	28068939	Mil2015|chr1_28068937	2	2	100
chr1	28122330	28122334	Kar2015|chr1_28122332	2	2	100
chr1	28149467	28149471	Mil2015|chr1_28149469	2	2	100
chr1	28199517	28199521	Mil2015|chr1_28199519	2	2	100
chr1	28206896	28206900	Mil2015|chr1_28206898	2	2	100
chr1	28252304	28252308	Kar2015|chr1_28252306	2	2	100
chr1	28307618	28307622	Kar2015|chr1_28307620	2	2	100
chr1	28327868	28327872	Kar2015|chr1_28327870	2	2	100
chr1	28349080	28349084	Mil2015|chr1_28349082	2	2	100
chr1	28360657	28360661	Mil2013_RM|chr1_28360659	2	2	100
chr1	28451146	28451150	Mil2015|chr1_28451148	2	2	100
chr1	28474381	28474385	Kar2015|chr1_28474383	2	2	100
chr1	28518644	28518648	Mil2015|chr1_28518646	2	2	100
chr1	28567715	28567719	Kar2015|chr1_28567717	2	2	100
chr1	28605605	28605609	Kar2015|chr1_28605607	2	2	100
chr1	28619074	28619078	Mil2015|chr1_28619076	2	2	100
chr1	28977106	28977110	Mil2015|chr1_28977108	2	2	100
chr1	29088411	29088415	Mil2015|chr1_29088413	2	2	100
chr1	29188724	29188728	Kar2015|chr1_29188726	2	2	100
chr1	29264118	29264122	Mil2015|chr1_29264120	2	2	100
chr1	29289788	29289792	Mil2015|chr1_29289790	2	2	100
chr1	29333059	29333063	Mil2015|chr1_29333061	2	2	100
chr1	29337013	29337017	Mil2015|chr1_29337015	2	2	100
chr1	29514060	29514064	Mil2015|chr1_29514062	2	2	100
chr1	29562819	29562823	Mil2015|chr1_29562821	2	2	100
chr1	29587742	29587746	Kar2015|chr1_29587744	2	2	100
chr1	29594861	29594865	Kar2015|chr1_29594863	2	2	100
chr1	29617396	29617400	Mil2015|chr1_29617398	2	2	100
chr1	29646277	29646281	Mil2015|chr1_29646279	2	2	100
chr1	29769109	29769113	Mil2015|chr1_29769111	2	2	100
chr1	29789983	29789987	Mil2015|chr1_29789985	2	2	100
chr1	29806473	29806477	Kar2015|chr1_29806475	2	2	100
chr1	29818794	29818798	Mil2015|chr1_29818796	2	2	100
chr1	29945140	29945144	Mil2015|chr1_29945142	2	2	100
chr1	29975570	29975574	Mil2015|chr1_29975572	2	2	100
chr1	29981662	29981666	Mil2015|chr1_29981664	2	2	100
chr1	30023113	30023117	Mil2015|chr1_30023115	2	2	100
chr1	30027643	30027647	Mil2015|chr1_30027645	2	2	100
chr1	30234595	30234599	Mil2015|chr1_30234597	2	2	100
chr1	30242451	30242455	Mil2015|chr1_30242453	2	2	100
chr1	30347878	30347882	Kar2015|chr1_30347880	2	2	100
chr1	30422982	30422986	Kar2015|chr1_30422984	2	2	100
chr1	30433391	30433395	Mil2015|chr1_30433393	2	2	100
chr1	30507626	30507630	Mil2015|chr1_30507628	2	2	100
chr1	30617915	30617919	Kar2015|chr1_30617917	2	2	100
chr1	30718290	30718294	Mil2013_shared|chr1_30718292	2	2	100
chr1	30744226	30744230	Mil2015|chr1_30744228	2	2	100
chr1	30761732	30761736	Kar2015|chr1_30761734	2	2	100
chr1	30818485	30818489	Kar2015|chr1_30818487	2	2	100
chr1	30892653	30892657	Mil2015|chr1_30892655	2	2	100
chr1	30919372	30919376	Mil2015|chr1_30919374	2	2	100
chr1	30922702	30922706	Kar2015|chr1_30922704	2	2	100
chr1	31006013	31006017	Mil2015|chr1_31006015	2	2	100
chr1	31011172	31011176	Mil2015|chr1_31011174	2	2	100
chr1	31016971	31016975	Kar2015|chr1_31016973	2	2	100
chr1	31061939	31061943	Mil2015|chr1_31061941	2	2	100
chr1	31327980	31327984	Kar2015|chr1_31327982	2	2	100
chr1	31369642	31369646	Kar2015|chr1_31369644	2	2	100
chr1	31373458	31373462	Mil2015|chr1_31373460	2	2	100
chr1	31378629	31378633	Kar2015|chr1_31378631	2	2	100
chr1	31386825	31386829	Kar2015|chr1_31386827	2	2	100
chr1	31433217	31433221	Kar2015|chr1_31433219	2	2	100
chr1	31478178	31478182	Kar2015|chr1_31478180	2	2	100
chr1	31482135	31482139	Kar2015|chr1_31482137	2	2	100
chr1	31518141	31518145	Mil2015|chr1_31518143	2	2	100
chr1	31543548	31543552	Kar2015|chr1_31543550	2	2	100
chr1	31548769	31548773	Mil2015|chr1_31548771	2	2	100
chr1	31668485	31668489	Mil2015|chr1_31668487	2	2	100
chr1	31699841	31699845	Mil2015|chr1_31699843	2	2	100
chr1	31729226	31729230	Mil2015|chr1_31729228	2	2	100
chr1	31734544	31734548	Mil2015|chr1_31734546	2	2	100
chr1	31812761	31812765	Mil2015|chr1_31812763	2	2	100
chr1	32042326	32042330	Mil2015|chr1_32042328	2	2	100
chr1	32072080	32072084	Mil2015|chr1_32072082	2	2	100
chr1	32089495	32089499	Mil2015|chr1_32089497	2	2	100
chr1	32120090	32120094	Mil2015|chr1_32120092	2	2	100
chr1	32126318	32126322	Kar2015|chr1_32126320	2	2	100
chr1	32154604	32154608	Kar2015|chr1_32154606	2	2	100
chr1	32235127	32235131	Mil2015|chr1_32235129	2	2	100
chr1	32257409	32257413	Mil2015|chr1_32257411	2	2	100
chr1	32419998	32420002	Kar2015|chr1_32420000	2	2	100
chr1	32440509	32440513	Mil2015|chr1_32440511	2	2	100
chr1	32445615	32445619	Mil2015|chr1_32445617	2	2	100
chr1	32451939	32451943	Mil2015|chr1_32451941	2	2	100
chr1	32611851	32611855	Mil2015|chr1_32611853	2	2	100
chr1	32696783	32696787	Kar2015|chr1_32696785	2	2	100
chr1	32717730	32717734	Kar2015|chr1_32717732	2	2	100
chr1	32727812	32727816	Kar2015|chr1_32727814	2	2	100
chr1	32982565	32982569	Mil2015|chr1_32982567	2	2	100
chr1	33057986	33057990	Mil2015|chr1_33057988	2	2	100
chr1	33152610	33152614	Mil2015|chr1_33152612	2	2	100
chr1	33157490	33157494	Mil2015|chr1_33157492	2	2	100
chr1	33177416	33177420	Mil2015|chr1_33177418	2	2	100
chr1	33200544	33200548	Mil2015|chr1_33200546	2	2	100
chr1	33212270	33212274	Mil2013_shared|chr1_33212272	2	2	100
chr1	33222503	33222507	Kar2015|chr1_33222505	2	2	100
chr1	33227466	33227470	Mil2015|chr1_33227468	2	2	100
chr1	33233353	33233357	Mil2015|chr1_33233355	2	2	100
chr1	33288726	33288730	Mil2015|chr1_33288728	2	2	100
chr1	33342010	33342014	Kar2015|chr1_33342012	2	2	100
chr1	33355244	33355248	Mil2015|chr1_33355246	2	2	100
chr1	33600965	33600969	Kar2015|chr1_33600967	2	2	100
chr1	33658704	33658708	Mil2015|chr1_33658706	2	2	100
chr1	33770985	33770989	Mil2015|chr1_33770987	2	2	100
chr1	33826874	33826878	Mil2015|chr1_33826876	2	2	100
chr1	33838782	33838786	Mil2015|chr1_33838784	2	2	100
chr1	33935722	33935726	Kar2015|chr1_33935724	2	2	100
chr1	33999408	33999412	Mil2015|chr1_33999410	2	2	100
chr1	34006302	34006306	Mil2015|chr1_34006304	2	2	100
chr1	34061382	34061386	Kar2015|chr1_34061384	2	2	100
chr1	34085338	34085342	Mil2015|chr1_34085340	2	2	100
chr1	34181029	34181033	Mil2015|chr1_34181031	2	2	100
chr1	34374098	34374102	Mil2015|chr1_34374100	2	2	100
chr1	34380269	34380273	Mil2015|chr1_34380271	2	2	100
chr1	34431672	34431676	Mil2015|chr1_34431674	2	2	100
chr1	34441262	34441266	Mil2015|chr1_34441264	2	2	100
chr1	34475112	34475116	Mil2015|chr1_34475114	2	2	100
chr1	34512295	34512299	Kar2015|chr1_34512297	2	2	100
chr1	34519532	34519536	Mil2015|chr1_34519534	2	2	100
chr1	34524627	34524631	Kar2015|chr1_34524629	2	2	100
chr1	34570311	34570315	Mil2015|chr1_34570313	2	2	100
chr1	34579492	34579496	Mil2015|chr1_34579494	2	2	100
chr1	34799804	34799808	Kar2015|chr1_34799806	2	2	100
chr1	34817079	34817083	Mil2015|chr1_34817081	2	2	100
chr1	34917238	34917242	Mil2015|chr1_34917240	2	2	100
chr1	34920913	34920917	Kar2015|chr1_34920915	2	2	100
chr1	34955830	34955834	Mil2015|chr1_34955832	2	2	100
chr1	34962077	34962081	Mil2015|chr1_34962079	2	2	100
chr1	34992754	34992758	Mil2015|chr1_34992756	2	2	100
chr1	35030637	35030641	Mil2015|chr1_35030639	2	2	100
chr1	35048787	35048791	Mil2015|chr1_35048789	2	2	100
chr1	35108783	35108787	Mil2015|chr1_35108785	2	2	100
chr1	35133172	35133176	Mil2015|chr1_35133174	2	2	100
chr1	35154030	35154034	Kar2015|chr1_35154032	2	2	100
chr1	35216019	35216023	Mil2015|chr1_35216021	2	2	100
chr1	35286821	35286825	Mil2015|chr1_35286823	2	2	100
chr1	35301780	35301784	Mil2015|chr1_35301782	2	2	100
chr1	35316825	35316829	Mil2015|chr1_35316827	2	2	100
chr1	35320114	35320118	Mil2015|chr1_35320116	2	2	100
chr1	35402135	35402139	Mil2015|chr1_35402137	2	2	100
chr1	35514810	35514814	Mil2015|chr1_35514812	2	2	100
chr1	35576653	35576657	Kar2015|chr1_35576655	2	2	100
chr1	35601295	35601299	Mil2015|chr1_35601297	2	2	100
chr1	35611059	35611063	Kar2015|chr1_35611061	2	2	100
chr1	35633390	35633394	Mil2015|chr1_35633392	2	2	100
chr1	35686412	35686416	Mil2015|chr1_35686414	2	2	100
chr1	35691034	35691038	Mil2015|chr1_35691036	2	2	100
chr1	35703519	35703523	Mil2015|chr1_35703521	2	2	100
chr1	35708765	35708769	Kar2015|chr1_35708767	2	2	100
chr1	35735738	35735742	Mil2015|chr1_35735740	2	2	100
chr1	35789866	35789870	Mil2015|chr1_35789868	2	2	100
chr1	35807595	35807599	Mil2015|chr1_35807597	2	2	100
chr1	35840606	35840610	Kar2015|chr1_35840608	2	2	100
chr1	35891507	35891511	Kar2015|chr1_35891509	2	2	100
chr1	35897088	35897092	Kar2015|chr1_35897090	2	2	100
chr1	36036284	36036288	Mil2015|chr1_36036286	2	2	100
chr1	36090755	36090759	Kar2015|chr1_36090757	2	2	100
chr1	36101240	36101244	Kar2015|chr1_36101242	2	2	100
chr1	36109049	36109053	Kar2015|chr1_36109051	2	2	100
chr1	36115217	36115221	Mil2015|chr1_36115219	2	2	100
chr1	36137803	36137807	Mil2015|chr1_36137805	2	2	100
chr1	36141940	36141944	Mil2015|chr1_36141942	2	2	100
chr1	36156151	36156155	Kar2015|chr1_36156153	2	2	100
chr1	36175139	36175143	Kar2015|chr1_36175141	2	2	100
chr1	36209315	36209319	Mil2015|chr1_36209317	2	2	100
chr1	36214526	36214530	Kar2015|chr1_36214528	2	2	100
chr1	36224981	36224985	Kar2015|chr1_36224983	2	2	100
chr1	36235788	36235792	Mil2015|chr1_36235790	2	2	100
chr1	36274842	36274846	Kar2015|chr1_36274844	2	2	100
chr1	36285558	36285562	Kar2015|chr1_36285560	2	2	100
chr1	36429734	36429738	Mil2015|chr1_36429736	2	2	100
chr1	36449439	36449443	Kar2015|chr1_36449441	2	2	100
chr1	36679260	36679264	Mil2013_shared|chr1_36679262	2	2	100
chr1	36712139	36712143	Kar2015|chr1_36712141	2	2	100
chr1	36769669	36769673	Mil2015|chr1_36769671	2	2	100
chr1	36785601	36785605	Mil2015|chr1_36785603	2	2	100
chr1	36870288	36870292	Kar2015|chr1_36870290	2	2	100
chr1	36937632	36937636	Mil2015|chr1_36937634	2	2	100
chr1	36943788	36943792	Kar2015|chr1_36943790	2	2	100
chr1	36969786	36969790	Kar2015|chr1_36969788	2	2	100
chr1	36996474	36996478	Mil2015|chr1_36996476	2	2	100
chr1	37002410	37002414	Kar2015|chr1_37002412	2	2	100
chr1	37042375	37042379	Mil2015|chr1_37042377	2	2	100
chr1	37221495	37221499	Mil2015|chr1_37221497	2	2	100
chr1	37436565	37436569	Mil2013_shared|chr1_37436567	2	2	100
chr1	37453321	37453325	Kar2015|chr1_37453323	2	2	100
chr1	37590534	37590538	Kar2015|chr1_37590536	2	2	100
chr1	37754793	37754797	Kar2015|chr1_37754795	2	2	100
chr1	37813036	37813040	Kar2015|chr1_37813038	2	2	100
chr1	37872001	37872005	Mil2015|chr1_37872003	2	2	100
chr1	37965027	37965031	Kar2015|chr1_37965029	2	2	100
chr1	37996356	37996360	Kar2015|chr1_37996358	2	2	100
chr1	38006171	38006175	Kar2015|chr1_38006173	2	2	100
chr1	38018722	38018726	Mil2015|chr1_38018724	2	2	100
chr1	38033176	38033180	Mil2015|chr1_38033178	2	2	100
chr1	38073568	38073572	Kar2015|chr1_38073570	2	2	100
chr1	38098663	38098667	Mil2015|chr1_38098665	2	2	100
chr1	38135920	38135924	Kar2015|chr1_38135922	2	2	100
chr1	38289571	38289575	Kar2015|chr1_38289573	2	2	100
chr1	38296050	38296054	Kar2015|chr1_38296052	2	2	100
chr1	38299371	38299375	Mil2015|chr1_38299373	2	2	100
chr1	38354816	38354820	Mil2015|chr1_38354818	2	2	100
chr1	38416725	38416729	Mil2015|chr1_38416727	2	2	100
chr1	38561781	38561785	Mil2015|chr1_38561783	2	2	100
chr1	38615802	38615806	Mil2015|chr1_38615804	2	2	100
chr1	38651553	38651557	Mil2015|chr1_38651555	2	2	100
chr1	38660432	38660436	Mil2015|chr1_38660434	2	2	100
chr1	38680430	38680434	Mil2018|chr1_38680432	2	2	100
chr1	38715531	38715535	Mil2015|chr1_38715533	2	2	100
chr1	38736451	38736455	Kar2015|chr1_38736453	2	2	100
chr1	38825688	38825692	Mil2015|chr1_38825690	2	2	100
chr1	38836760	38836764	Kar2015|chr1_38836762	2	2	100
chr1	38842756	38842760	Kar2015|chr1_38842758	2	2	100
chr1	38891593	38891597	Mil2015|chr1_38891595	2	2	100
chr1	38896861	38896865	Kar2015|chr1_38896863	2	2	100
chr1	38959243	38959247	Mil2015|chr1_38959245	2	2	100
chr1	38995939	38995943	Mil2015|chr1_38995941	2	2	100
chr1	39035448	39035452	Kar2015|chr1_39035450	2	2	100
chr1	39144304	39144308	Mil2015|chr1_39144306	2	2	100
chr1	39156677	39156681	Mil2015|chr1_39156679	2	2	100
chr1	39192418	39192422	Mil2015|chr1_39192420	2	2	100
chr1	39214094	39214098	Mil2015|chr1_39214096	2	2	100
chr1	39222907	39222911	Mil2015|chr1_39222909	2	2	100
chr1	39257683	39257687	Mil2015|chr1_39257685	2	2	100
chr1	39270759	39270763	Mil2015|chr1_39270761	2	2	100
chr1	39281634	39281638	Mil2015|chr1_39281636	2	2	100
chr1	39306915	39306919	Kar2015|chr1_39306917	2	2	100
chr1	39326946	39326950	Mil2015|chr1_39326948	2	2	100
chr1	39440937	39440941	Kar2015|chr1_39440939	2	2	100
chr1	39612671	39612675	Mil2015|chr1_39612673	2	2	100
chr1	39622202	39622206	Mil2015|chr1_39622204	2	2	100
chr1	39652912	39652916	Mil2015|chr1_39652914	2	2	100
chr1	39749338	39749342	Mil2015|chr1_39749340	2	2	100
chr1	39776573	39776577	Kar2015|chr1_39776575	2	2	100
chr1	39785990	39785994	Kar2015|chr1_39785992	2	2	100
chr1	39798297	39798301	Kar2015|chr1_39798299	2	2	100
chr1	39803423	39803427	Kar2015|chr1_39803425	2	2	100
chr1	39808255	39808259	Kar2015|chr1_39808257	2	2	100
chr1	39832328	39832332	Mil2015|chr1_39832330	2	2	100
chr1	39973530	39973534	Mil2015|chr1_39973532	2	2	100
chr1	40080244	40080248	Mil2015|chr1_40080246	2	2	100
chr1	40089839	40089843	Mil2015|chr1_40089841	2	2	100
chr1	40150943	40150947	Kar2015|chr1_40150945	2	2	100
chr1	40190800	40190804	Mil2015|chr1_40190802	2	2	100
chr1	40239985	40239989	Mil2015|chr1_40239987	2	2	100
chr1	40355370	40355374	Kar2015|chr1_40355372	2	2	100
chr1	40415956	40415960	Mil2015|chr1_40415958	2	2	100
chr1	40431019	40431023	Mil2015|chr1_40431021	2	2	100
chr1	40437721	40437725	Kar2015|chr1_40437723	2	2	100
chr1	40472224	40472228	Mil2015|chr1_40472226	2	2	100
chr1	40498631	40498635	Mil2015|chr1_40498633	2	2	100
chr1	40503197	40503201	Mil2015|chr1_40503199	2	2	100
chr1	40519521	40519525	Mil2015|chr1_40519523	2	2	100
chr1	40564640	40564644	Mil2015|chr1_40564642	2	2	100
chr1	40599982	40599986	Mil2015|chr1_40599984	2	2	100
chr1	40661130	40661134	Kar2015|chr1_40661132	2	2	100
chr1	40722853	40722857	Mil2015|chr1_40722855	2	2	100
chr1	40761643	40761647	Mil2015|chr1_40761645	2	2	100
chr1	40788469	40788473	Mil2015|chr1_40788471	2	2	100
chr1	40813354	40813358	Kar2015|chr1_40813356	2	2	100
chr1	40819567	40819571	Kar2015|chr1_40819569	2	2	100
chr1	40828840	40828844	Mil2015|chr1_40828842	2	2	100
chr1	40857806	40857810	Kar2015|chr1_40857808	2	2	100
chr1	40876613	40876617	Mil2015|chr1_40876615	2	2	100
chr1	40931611	40931615	Kar2015|chr1_40931613	2	2	100
chr1	40966158	40966162	Kar2015|chr1_40966160	2	2	100
chr1	41057754	41057758	Mil2015|chr1_41057756	2	2	100
chr1	41062514	41062518	Mil2015|chr1_41062516	2	2	100
chr1	41160975	41160979	Kar2015|chr1_41160977	2	2	100
chr1	41174670	41174674	Kar2015|chr1_41174672	2	2	100
chr1	41212026	41212030	Kar2015|chr1_41212028	2	2	100
chr1	41225923	41225927	Kar2015|chr1_41225925	2	2	100
chr1	41286871	41286875	Kar2015|chr1_41286873	2	2	100
chr1	41310195	41310199	Kar2015|chr1_41310197	2	2	100
chr1	41336753	41336757	Mil2015|chr1_41336755	2	2	100
chr1	41429866	41429870	Kar2015|chr1_41429868	2	2	100
chr1	41438960	41438964	Kar2015|chr1_41438962	2	2	100
chr1	41464686	41464690	Mil2015|chr1_41464688	2	2	100
chr1	41483429	41483433	Kar2015|chr1_41483431	2	2	100
chr1	41510972	41510976	Mil2015|chr1_41510974	2	2	100
chr1	41533526	41533530	Kar2015|chr1_41533528	2	2	100
chr1	41611749	41611753	Mil2015|chr1_41611751	2	2	100
chr1	41647084	41647088	Mil2015|chr1_41647086	2	2	100
chr1	41815169	41815173	Mil2015|chr1_41815171	2	2	100
chr1	41833022	41833026	Mil2015|chr1_41833024	2	2	100
chr1	41858976	41858980	Mil2015|chr1_41858978	2	2	100
chr1	41871103	41871107	Kar2015|chr1_41871105	2	2	100
chr1	41878667	41878671	Kar2015|chr1_41878669	2	2	100
chr1	41890093	41890097	Mil2015|chr1_41890095	2	2	100
chr1	41913597	41913601	Mil2015|chr1_41913599	2	2	100
chr1	41938952	41938956	Mil2015|chr1_41938954	2	2	100
chr1	41943104	41943108	Kar2015|chr1_41943106	2	2	100
chr1	42011424	42011428	Mil2015|chr1_42011426	2	2	100
chr1	42018430	42018434	Kar2015|chr1_42018432	2	2	100
chr1	42022830	42022834	Mil2015|chr1_42022832	2	2	100
chr1	42027229	42027233	Kar2015|chr1_42027231	2	2	100
chr1	42049911	42049915	Mil2015|chr1_42049913	2	2	100
chr1	42064604	42064608	Mil2015|chr1_42064606	2	2	100
chr1	42119723	42119727	Mil2015|chr1_42119725	2	2	100
chr1	42128073	42128077	Mil2015|chr1_42128075	2	2	100
chr1	42264842	42264846	Mil2015|chr1_42264844	2	2	100
chr1	42276447	42276451	Mil2015|chr1_42276449	2	2	100
chr1	42312178	42312182	Kar2015|chr1_42312180	2	2	100
chr1	42324848	42324852	Mil2015|chr1_42324850	2	2	100
chr1	42401676	42401680	Kar2015|chr1_42401678	2	2	100
chr1	42521894	42521898	Kar2015|chr1_42521896	2	2	100
chr1	42588601	42588605	Kar2015|chr1_42588603	2	2	100
chr1	42631930	42631934	Kar2015|chr1_42631932	2	2	100
chr1	42693489	42693493	Mil2015|chr1_42693491	2	2	100
chr1	42758094	42758098	Kar2015|chr1_42758096	2	2	100
chr1	42875523	42875527	Kar2015|chr1_42875525	2	2	100
chr1	42960472	42960476	Kar2015|chr1_42960474	2	2	100
chr1	43015312	43015316	Kar2015|chr1_43015314	2	2	100
chr1	43065158	43065162	Mil2013_NBR|chr1_43065160	2	2	100
chr1	43131151	43131155	Kar2015|chr1_43131153	2	2	100
chr1	43185806	43185810	Kar2015|chr1_43185808	2	2	100
chr1	43222138	43222142	Kar2015|chr1_43222140	2	2	100
chr1	43237221	43237225	Kar2015|chr1_43237223	2	2	100
chr1	43290681	43290685	Mil2018|chr1_43290683	2	2	100
chr1	43300384	43300388	Mil2015|chr1_43300386	2	2	100
chr1	43339242	43339246	Mil2015|chr1_43339244	2	2	100
chr1	43371750	43371754	Mil2015|chr1_43371752	2	2	100
chr1	43388834	43388838	Mil2015|chr1_43388836	2	2	100
chr1	43417704	43417708	Kar2015|chr1_43417706	2	2	100
chr1	43435811	43435815	Mil2015|chr1_43435813	2	2	100
chr1	43473059	43473063	Mil2015|chr1_43473061	2	2	100
chr1	43490574	43490578	Mil2015|chr1_43490576	2	2	100
chr1	43508775	43508779	Kar2015|chr1_43508777	2	2	100
chr1	43553624	43553628	Mil2015|chr1_43553626	2	2	100
chr1	43628311	43628315	Mil2015|chr1_43628313	2	2	100
chr1	43636709	43636713	Kar2015|chr1_43636711	2	2	100
chr1	43724037	43724041	Mil2015|chr1_43724039	2	2	100
chr1	43730060	43730064	Mil2015|chr1_43730062	2	2	100
chr1	43837209	43837213	Mil2015|chr1_43837211	2	2	100
chr1	43904592	43904596	Mil2015|chr1_43904594	2	2	100
chr1	44312692	44312696	Kar2015|chr1_44312694	2	2	100
chr1	44316648	44316652	Mil2015|chr1_44316650	2	2	100
chr1	44341811	44341815	Mil2015|chr1_44341813	2	2	100
chr1	44416300	44416304	Kar2015|chr1_44416302	2	2	100
chr1	44430462	44430466	Kar2015|chr1_44430464	2	2	100
chr1	44488542	44488546	Kar2015|chr1_44488544	2	2	100
chr1	44528123	44528127	Mil2015|chr1_44528125	2	2	100
chr1	44600877	44600881	Kar2015|chr1_44600879	2	2	100
chr1	44611157	44611161	Mil2015|chr1_44611159	2	2	100
chr1	44631014	44631018	Mil2015|chr1_44631016	2	2	100
chr1	44635805	44635809	Mil2015|chr1_44635807	2	2	100
chr1	44672677	44672681	Mil2015|chr1_44672679	2	2	100
chr1	44678667	44678671	Mil2015|chr1_44678669	2	2	100
chr1	44721705	44721709	Kar2015|chr1_44721707	2	2	100
chr1	44772087	44772091	Mil2015|chr1_44772089	2	2	100
chr1	44782563	44782567	Kar2015|chr1_44782565	2	2	100
chr1	44798348	44798352	Mil2015|chr1_44798350	2	2	100
chr1	44853298	44853302	Kar2015|chr1_44853300	2	2	100
chr1	44859982	44859986	Mil2015|chr1_44859984	2	2	100
chr1	44887424	44887428	Mil2015|chr1_44887426	2	2	100
chr1	44925500	44925504	Kar2015|chr1_44925502	2	2	100
chr1	44944222	44944226	Mil2015|chr1_44944224	2	2	100
chr1	44953349	44953353	Mil2015|chr1_44953351	2	2	100
chr1	44992500	44992504	Mil2015|chr1_44992502	2	2	100
chr1	45006342	45006346	Mil2015|chr1_45006344	2	2	100
chr1	45045698	45045702	Mil2015|chr1_45045700	2	2	100
chr1	45087805	45087809	Mil2015|chr1_45087807	2	2	100
chr1	45104152	45104156	Mil2013_shared|chr1_45104154	2	2	100
chr1	45140157	45140161	Mil2015|chr1_45140159	2	2	100
chr1	45262144	45262148	Mil2015|chr1_45262146	2	2	100
chr1	45294741	45294745	Kar2015|chr1_45294743	2	2	100
chr1	45304711	45304715	Kar2015|chr1_45304713	2	2	100
chr1	45324401	45324405	Kar2015|chr1_45324403	2	2	100
chr1	45335609	45335613	Mil2015|chr1_45335611	2	2	100
chr1	45384036	45384040	Kar2015|chr1_45384038	2	2	100
chr1	45396339	45396343	Mil2015|chr1_45396341	2	2	100
chr1	45399683	45399687	Mil2015|chr1_45399685	2	2	100
chr1	45424911	45424915	Mil2015|chr1_45424913	2	2	100
chr1	45429855	45429859	Kar2015|chr1_45429857	2	2	100
chr1	45467049	45467053	Kar2015|chr1_45467051	2	2	100
chr1	45593540	45593544	Kar2015|chr1_45593542	2	2	100
chr1	45602946	45602950	Kar2015|chr1_45602948	2	2	100
chr1	45637611	45637615	Kar2015|chr1_45637613	2	2	100
chr1	45815330	45815334	Kar2015|chr1_45815332	2	2	100
chr1	45956681	45956685	Mil2015|chr1_45956683	2	2	100
chr1	46158538	46158542	Mil2015|chr1_46158540	2	2	100
chr1	46175271	46175275	Mil2015|chr1_46175273	2	2	100
chr1	46186993	46186997	Kar2015|chr1_46186995	2	2	100
chr1	46214554	46214558	Mil2015|chr1_46214556	2	2	100
chr1	46287198	46287202	Kar2015|chr1_46287200	2	2	100
chr1	46508271	46508275	Kar2015|chr1_46508273	2	2	100
chr1	46602923	46602927	Kar2015|chr1_46602925	2	2	100
chr1	46622057	46622061	Mil2015|chr1_46622059	2	2	100
chr1	46715824	46715828	Mil2015|chr1_46715826	2	2	100
chr1	46729759	46729763	Mil2015|chr1_46729761	2	2	100
chr1	46734356	46734360	Mil2015|chr1_46734358	2	2	100
chr1	46745950	46745954	Mil2015|chr1_46745952	2	2	100
chr1	46762484	46762488	Kar2015|chr1_46762486	2	2	100
chr1	46773895	46773899	Mil2015|chr1_46773897	2	2	100
chr1	46790387	46790391	Mil2015|chr1_46790389	2	2	100
chr1	46794153	46794157	Mil2015|chr1_46794155	2	2	100
chr1	46812393	46812397	Mil2015|chr1_46812395	2	2	100
chr1	46848773	46848777	Mil2015|chr1_46848775	2	2	100
chr1	46943561	46943565	Mil2015|chr1_46943563	2	2	100
chr1	46971902	46971906	Mil2015|chr1_46971904	2	2	100
chr1	46997481	46997485	Mil2015|chr1_46997483	2	2	100
chr1	47005506	47005510	Mil2015|chr1_47005508	2	2	100
chr1	47011625	47011629	Mil2015|chr1_47011627	2	2	100
chr1	47026487	47026491	Mil2015|chr1_47026489	2	2	100
chr1	47078235	47078239	Mil2013_NBR|chr1_47078237	2	2	100
chr1	47091832	47091836	Mil2015|chr1_47091834	2	2	100
chr1	47107409	47107413	Mil2015|chr1_47107411	2	2	100
chr1	47125907	47125911	Mil2015|chr1_47125909	2	2	100
chr1	47131429	47131433	Mil2015|chr1_47131431	2	2	100
chr1	47153669	47153673	Mil2015|chr1_47153671	2	2	100
chr1	47174693	47174697	Kar2015|chr1_47174695	2	2	100
chr1	47198169	47198173	Mil2015|chr1_47198171	2	2	100
chr1	47230796	47230800	Mil2015|chr1_47230798	2	2	100
chr1	47269361	47269365	Mil2015|chr1_47269363	2	2	100
chr1	47364358	47364362	Mil2015|chr1_47364360	2	2	100
chr1	47373843	47373847	Mil2015|chr1_47373845	2	2	100
chr1	47401087	47401091	Kar2015|chr1_47401089	2	2	100
chr1	47460957	47460961	Mil2015|chr1_47460959	2	2	100
chr1	47474630	47474634	Mil2015|chr1_47474632	2	2	100
chr1	47479105	47479109	Kar2015|chr1_47479107	2	2	100
chr1	47498161	47498165	Mil2015|chr1_47498163	2	2	100
chr1	47505611	47505615	Mil2015|chr1_47505613	2	2	100
chr1	47525786	47525790	Mil2015|chr1_47525788	2	2	100
chr1	47536410	47536414	Kar2015|chr1_47536412	2	2	100
chr1	47559947	47559951	Kar2015|chr1_47559949	2	2	100
chr1	47577338	47577342	Mil2015|chr1_47577340	2	2	100
chr1	47581635	47581639	Mil2015|chr1_47581637	2	2	100
chr1	47585186	47585190	Mil2015|chr1_47585188	2	2	100
chr1	47602734	47602738	Mil2015|chr1_47602736	2	2	100
chr1	47611615	47611619	Mil2015|chr1_47611617	2	2	100
chr1	47616805	47616809	Mil2015|chr1_47616807	2	2	100
chr1	47686732	47686736	Kar2015|chr1_47686734	2	2	100
chr1	47733143	47733147	Mil2015|chr1_47733145	2	2	100
chr1	47760673	47760677	Kar2015|chr1_47760675	2	2	100
chr1	47791362	47791366	Mil2015|chr1_47791364	2	2	100
chr1	47895735	47895739	Mil2015|chr1_47895737	2	2	100
chr1	47910692	47910696	Kar2015|chr1_47910694	2	2	100
chr1	47930838	47930842	Mil2015|chr1_47930840	2	2	100
chr1	47991914	47991918	Mil2015|chr1_47991916	2	2	100
chr1	48010970	48010974	Kar2015|chr1_48010972	2	2	100
chr1	48059866	48059870	Mil2015|chr1_48059868	2	2	100
chr1	48075820	48075824	Mil2015|chr1_48075822	2	2	100
chr1	48155585	48155589	Kar2015|chr1_48155587	2	2	100
chr1	48167216	48167220	Kar2015|chr1_48167218	2	2	100
chr1	48210244	48210248	Kar2015|chr1_48210246	2	2	100
chr1	48378577	48378581	Kar2015|chr1_48378579	2	2	100
chr1	48403502	48403506	Mil2015|chr1_48403504	2	2	100
chr1	48444765	48444769	Kar2015|chr1_48444767	2	2	100
chr1	48460509	48460513	Mil2015|chr1_48460511	2	2	100
chr1	48537787	48537791	Mil2015|chr1_48537789	2	2	100
chr1	48697515	48697519	Kar2015|chr1_48697517	2	2	100
chr1	48711193	48711197	Kar2015|chr1_48711195	2	2	100
chr1	48750880	48750884	Mil2015|chr1_48750882	2	2	100
chr1	48824980	48824984	Kar2015|chr1_48824982	2	2	100
chr1	48832996	48833000	Mil2015|chr1_48832998	2	2	100
chr1	48841318	48841322	Kar2015|chr1_48841320	2	2	100
chr1	49016760	49016764	Kar2015|chr1_49016762	2	2	100
chr1	49063335	49063339	Mil2015|chr1_49063337	2	2	100
chr1	49089937	49089941	Kar2015|chr1_49089939	2	2	100
chr1	49138870	49138874	Mil2018|chr1_49138872	2	2	100
chr1	49188266	49188270	Mil2015|chr1_49188268	2	2	100
chr1	49243721	49243725	Mil2015|chr1_49243723	2	2	100
chr1	49256946	49256950	Mil2015|chr1_49256948	2	2	100
chr1	49263130	49263134	Mil2015|chr1_49263132	2	2	100
chr1	49280621	49280625	Mil2015|chr1_49280623	2	2	100
chr1	49327918	49327922	Mil2015|chr1_49327920	2	2	100
chr1	49381798	49381802	Mil2015|chr1_49381800	2	2	100
chr1	49399107	49399111	Mil2015|chr1_49399109	2	2	100
chr1	49483818	49483822	Mil2015|chr1_49483820	2	2	100
chr1	49560692	49560696	Mil2015|chr1_49560694	2	2	100
chr1	49566585	49566589	Mil2015|chr1_49566587	2	2	100
chr1	49576216	49576220	Mil2015|chr1_49576218	2	2	100
chr1	49596770	49596774	Kar2015|chr1_49596772	2	2	100
chr1	49600246	49600250	Mil2015|chr1_49600248	2	2	100
chr1	49631537	49631541	Kar2015|chr1_49631539	2	2	100
chr1	49674894	49674898	Mil2015|chr1_49674896	2	2	100
chr1	49682849	49682853	Mil2015|chr1_49682851	2	2	100
chr1	49702933	49702937	Mil2015|chr1_49702935	2	2	100
chr1	49736935	49736939	Mil2015|chr1_49736937	2	2	100
chr1	49760996	49761000	Mil2015|chr1_49760998	2	2	100
chr1	49771572	49771576	Mil2015|chr1_49771574	2	2	100
chr1	49820096	49820100	Mil2015|chr1_49820098	2	2	100
chr1	49857141	49857145	Mil2015|chr1_49857143	2	2	100
chr1	49883154	49883158	Kar2015|chr1_49883156	2	2	100
chr1	49891886	49891890	Kar2015|chr1_49891888	2	2	100
chr1	49961233	49961237	Mil2015|chr1_49961235	2	2	100
chr1	49996347	49996351	Kar2015|chr1_49996349	2	2	100
chr1	50051395	50051399	Mil2015|chr1_50051397	2	2	100
chr1	50110070	50110074	Mil2015|chr1_50110072	2	2	100
chr1	50116904	50116908	Mil2015|chr1_50116906	2	2	100
chr1	50120514	50120518	Mil2015|chr1_50120516	2	2	100
chr1	50151029	50151033	Mil2015|chr1_50151031	2	2	100
chr1	50154338	50154342	Mil2015|chr1_50154340	2	2	100
chr1	50161020	50161024	Mil2015|chr1_50161022	2	2	100
chr1	50205065	50205069	Mil2015|chr1_50205067	2	2	100
chr1	50230735	50230739	Kar2015|chr1_50230737	2	2	100
chr1	50249458	50249462	Mil2015|chr1_50249460	2	2	100
chr1	50260924	50260928	Mil2015|chr1_50260926	2	2	100
chr1	50318278	50318282	Kar2015|chr1_50318280	2	2	100
chr1	50389362	50389366	Mil2015|chr1_50389364	2	2	100
chr1	50398999	50399003	Kar2015|chr1_50399001	2	2	100
chr1	50432386	50432390	Mil2015|chr1_50432388	2	2	100
chr1	50445970	50445974	Mil2015|chr1_50445972	2	2	100
chr1	50460895	50460899	Mil2015|chr1_50460897	2	2	100
chr1	50467121	50467125	Mil2015|chr1_50467123	2	2	100
chr1	50489694	50489698	Mil2015|chr1_50489696	2	2	100
chr1	50494523	50494527	Kar2015|chr1_50494525	2	2	100
chr1	50530026	50530030	Mil2015|chr1_50530028	2	2	100
chr1	50534252	50534256	Mil2015|chr1_50534254	2	2	100
chr1	50572076	50572080	Mil2015|chr1_50572078	2	2	100
chr1	50581177	50581181	Mil2015|chr1_50581179	2	2	100
chr1	50586402	50586406	Mil2015|chr1_50586404	2	2	100
chr1	50596204	50596208	Mil2015|chr1_50596206	2	2	100
chr1	50623415	50623419	Mil2015|chr1_50623417	2	2	100
chr1	50642273	50642277	Mil2015|chr1_50642275	2	2	100
chr1	50646142	50646146	Mil2015|chr1_50646144	2	2	100
chr1	50658942	50658946	Mil2015|chr1_50658944	2	2	100
chr1	50686920	50686924	Kar2015|chr1_50686922	2	2	100
chr1	50715768	50715772	Mil2015|chr1_50715770	2	2	100
chr1	50786814	50786818	Mil2015|chr1_50786816	2	2	100
chr1	50798284	50798288	Mil2015|chr1_50798286	2	2	100
chr1	50815071	50815075	Mil2015|chr1_50815073	2	2	100
chr1	50826182	50826186	Mil2015|chr1_50826184	2	2	100
chr1	50892712	50892716	Kar2015|chr1_50892714	2	2	100
chr1	50903859	50903863	Mil2015|chr1_50903861	2	2	100
chr1	50912770	50912774	Mil2015|chr1_50912772	2	2	100
chr1	50934164	50934168	Mil2015|chr1_50934166	2	2	100
chr1	50939257	50939261	Mil2015|chr1_50939259	2	2	100
chr1	50944134	50944138	Mil2015|chr1_50944136	2	2	100
chr1	51004590	51004594	Kar2015|chr1_51004592	2	2	100
chr1	51014360	51014364	Kar2015|chr1_51014362	2	2	100
chr1	51021322	51021326	Kar2015|chr1_51021324	2	2	100
chr1	51099359	51099363	Mil2015|chr1_51099361	2	2	100
chr1	51119380	51119384	Mil2015|chr1_51119382	2	2	100
chr1	51248651	51248655	Kar2015|chr1_51248653	2	2	100
chr1	51268608	51268612	Mil2015|chr1_51268610	2	2	100
chr1	51333080	51333084	Kar2015|chr1_51333082	2	2	100
chr1	51370658	51370662	Mil2015|chr1_51370660	2	2	100
chr1	51472027	51472031	Mil2015|chr1_51472029	2	2	100
chr1	51489553	51489557	Mil2015|chr1_51489555	2	2	100
chr1	51517207	51517211	Mil2015|chr1_51517209	2	2	100
chr1	51530992	51530996	Mil2015|chr1_51530994	2	2	100
chr1	51642011	51642015	Mil2015|chr1_51642013	2	2	100
chr1	51676447	51676451	Kar2015|chr1_51676449	2	2	100
chr1	51726705	51726709	Kar2015|chr1_51726707	2	2	100
chr1	51733652	51733656	Mil2015|chr1_51733654	2	2	100
chr1	51748118	51748122	Mil2015|chr1_51748120	2	2	100
chr1	51775669	51775673	Kar2015|chr1_51775671	2	2	100
chr1	51793508	51793512	Mil2015|chr1_51793510	2	2	100
chr1	51836632	51836636	Mil2015|chr1_51836634	2	2	100
chr1	51865617	51865621	Mil2015|chr1_51865619	2	2	100
chr1	51940248	51940252	Mil2015|chr1_51940250	2	2	100
chr1	51961203	51961207	Mil2015|chr1_51961205	2	2	100
chr1	51965427	51965431	Mil2015|chr1_51965429	2	2	100
chr1	52008081	52008085	Kar2015|chr1_52008083	2	2	100
chr1	52024709	52024713	Mil2015|chr1_52024711	2	2	100
chr1	52114029	52114033	Mil2015|chr1_52114031	2	2	100
chr1	52122875	52122879	Mil2015|chr1_52122877	2	2	100
chr1	52129776	52129780	Mil2015|chr1_52129778	2	2	100
chr1	52144944	52144948	Mil2015|chr1_52144946	2	2	100
chr1	52184800	52184804	Mil2015|chr1_52184802	2	2	100
chr1	52205487	52205491	Mil2015|chr1_52205489	2	2	100
chr1	52227563	52227567	Mil2015|chr1_52227565	2	2	100
chr1	52251485	52251489	Kar2015|chr1_52251487	2	2	100
chr1	52314250	52314254	Kar2015|chr1_52314252	2	2	100
chr1	52345635	52345639	Mil2015|chr1_52345637	2	2	100
chr1	52365773	52365777	Mil2015|chr1_52365775	2	2	100
chr1	52370768	52370772	Mil2015|chr1_52370770	2	2	100
chr1	52452297	52452301	Kar2015|chr1_52452299	2	2	100
chr1	52630940	52630944	Mil2013_RM|chr1_52630942	2	2	100
chr1	52642035	52642039	Mil2015|chr1_52642037	2	2	100
chr1	52652539	52652543	Kar2015|chr1_52652541	2	2	100
chr1	52683274	52683278	Mil2015|chr1_52683276	2	2	100
chr1	52710192	52710196	Mil2015|chr1_52710194	2	2	100
chr1	52760096	52760100	Kar2015|chr1_52760098	2	2	100
chr1	52776020	52776024	Kar2015|chr1_52776022	2	2	100
chr1	52786258	52786262	Kar2015|chr1_52786260	2	2	100
chr1	52802210	52802214	Kar2015|chr1_52802212	2	2	100
chr1	52936820	52936824	Kar2015|chr1_52936822	2	2	100
chr1	52955455	52955459	Kar2015|chr1_52955457	2	2	100
chr1	52968761	52968765	Kar2015|chr1_52968763	2	2	100
chr1	53020329	53020333	Kar2015|chr1_53020331	2	2	100
chr1	53034873	53034877	Kar2015|chr1_53034875	2	2	100
chr1	53102704	53102708	Mil2015|chr1_53102706	2	2	100
chr1	53125391	53125395	Kar2015|chr1_53125393	2	2	100
chr1	53157255	53157259	Kar2015|chr1_53157257	2	2	100
chr1	53287808	53287812	Mil2015|chr1_53287810	2	2	100
chr1	53447800	53447804	Mil2015|chr1_53447802	2	2	100
chr1	53501157	53501161	Mil2015|chr1_53501159	2	2	100
chr1	53522178	53522182	Mil2015|chr1_53522180	2	2	100
chr1	53534664	53534668	Mil2015|chr1_53534666	2	2	100
chr1	53557542	53557546	Mil2018|chr1_53557544	2	2	100
chr1	53564261	53564265	Mil2015|chr1_53564263	2	2	100
chr1	53584870	53584874	Mil2015|chr1_53584872	2	2	100
chr1	53637878	53637882	Mil2015|chr1_53637880	2	2	100
chr1	53652570	53652574	Kar2015|chr1_53652572	2	2	100
chr1	53669057	53669061	Mil2015|chr1_53669059	2	2	100
chr1	53686329	53686333	Mil2015|chr1_53686331	2	2	100
chr1	53750407	53750411	Mil2015|chr1_53750409	2	2	100
chr1	53774691	53774695	Kar2015|chr1_53774693	2	2	100
chr1	53814004	53814008	Mil2015|chr1_53814006	2	2	100
chr1	53871804	53871808	Kar2015|chr1_53871806	2	2	100
chr1	53902036	53902040	Mil2015|chr1_53902038	2	2	100
chr1	53931582	53931586	Kar2015|chr1_53931584	2	2	100
chr1	53952771	53952775	Mil2015|chr1_53952773	2	2	100
chr1	54030050	54030054	Mil2015|chr1_54030052	2	2	100
chr1	54240241	54240245	Kar2015|chr1_54240243	2	2	100
chr1	54271714	54271718	Mil2015|chr1_54271716	2	2	100
chr1	54275535	54275539	Mil2015|chr1_54275537	2	2	100
chr1	54291244	54291248	Mil2015|chr1_54291246	2	2	100
chr1	54317661	54317665	Mil2015|chr1_54317663	2	2	100
chr1	54336419	54336423	Mil2015|chr1_54336421	2	2	100
chr1	54365531	54365535	Mil2015|chr1_54365533	2	2	100
chr1	54398240	54398244	Mil2015|chr1_54398242	2	2	100
chr1	54426753	54426757	Mil2015|chr1_54426755	2	2	100
chr1	54455649	54455653	Mil2015|chr1_54455651	2	2	100
chr1	54462041	54462045	Kar2015|chr1_54462043	2	2	100
chr1	54509692	54509696	Kar2015|chr1_54509694	2	2	100
chr1	54538309	54538313	Mil2015|chr1_54538311	2	2	100
chr1	54566058	54566062	Kar2015|chr1_54566060	2	2	100
chr1	54639830	54639834	Kar2015|chr1_54639832	2	2	100
chr1	54784802	54784806	Kar2015|chr1_54784804	2	2	100
chr1	54834285	54834289	Kar2015|chr1_54834287	2	2	100
chr1	54927534	54927538	Mil2015|chr1_54927536	2	2	100
chr1	54952088	54952092	Mil2015|chr1_54952090	2	2	100
chr1	54997372	54997376	Kar2015|chr1_54997374	2	2	100
chr1	55102757	55102761	Kar2015|chr1_55102759	2	2	100
chr1	55145129	55145133	Kar2015|chr1_55145131	2	2	100
chr1	55202872	55202876	Kar2015|chr1_55202874	2	2	100
chr1	55257978	55257982	Kar2015|chr1_55257980	2	2	100
chr1	55556223	55556227	Mil2015|chr1_55556225	2	2	100
chr1	55789778	55789782	Kar2015|chr1_55789780	2	2	100
chr1	55808923	55808927	Mil2015|chr1_55808925	2	2	100
chr1	55821240	55821244	Mil2015|chr1_55821242	2	2	100
chr1	55894806	55894810	Kar2015|chr1_55894808	2	2	100
chr1	55939702	55939706	Mil2015|chr1_55939704	2	2	100
chr1	56148976	56148980	Mil2015|chr1_56148978	2	2	100
chr1	56180988	56180992	Kar2015|chr1_56180990	2	2	100
chr1	56186975	56186979	Mil2015|chr1_56186977	2	2	100
chr1	56206999	56207003	Mil2015|chr1_56207001	2	2	100
chr1	56272859	56272863	Kar2015|chr1_56272861	2	2	100
chr1	56327894	56327898	Mil2015|chr1_56327896	2	2	100
chr1	56411571	56411575	Mil2018|chr1_56411573	2	2	100
chr1	56431473	56431477	Mil2015|chr1_56431475	2	2	100
chr1	56437796	56437800	Mil2015|chr1_56437798	2	2	100
chr1	56448810	56448814	Mil2015|chr1_56448812	2	2	100
chr1	56502127	56502131	Kar2015|chr1_56502129	2	2	100
chr1	56516834	56516838	Mil2015|chr1_56516836	2	2	100
chr1	56595010	56595014	Mil2015|chr1_56595012	2	2	100
chr1	56599470	56599474	Mil2015|chr1_56599472	2	2	100
chr1	56616000	56616004	Kar2015|chr1_56616002	2	2	100
chr1	56631599	56631603	Kar2015|chr1_56631601	2	2	100
chr1	56728599	56728603	Mil2015|chr1_56728601	2	2	100
chr1	56785810	56785814	Kar2015|chr1_56785812	2	2	100
chr1	56817728	56817732	Mil2015|chr1_56817730	2	2	100
chr1	56879372	56879376	Mil2015|chr1_56879374	2	2	100
chr1	56901993	56901997	Mil2015|chr1_56901995	2	2	100
chr1	56905515	56905519	Kar2015|chr1_56905517	2	2	100
chr1	56975313	56975317	Kar2015|chr1_56975315	2	2	100
chr1	57003495	57003499	Mil2015|chr1_57003497	2	2	100
chr1	57031449	57031453	Mil2015|chr1_57031451	2	2	100
chr1	57036153	57036157	Mil2015|chr1_57036155	2	2	100
chr1	57093158	57093162	Kar2015|chr1_57093160	2	2	100
chr1	57097890	57097894	Kar2015|chr1_57097892	2	2	100
chr1	57114025	57114029	Kar2015|chr1_57114027	2	2	100
chr1	57122358	57122362	Mil2015|chr1_57122360	2	2	100
chr1	57148179	57148183	Mil2015|chr1_57148181	2	2	100
chr1	57166841	57166845	Kar2015|chr1_57166843	2	2	100
chr1	57180836	57180840	Mil2015|chr1_57180838	2	2	100
chr1	57268827	57268831	Mil2015|chr1_57268829	2	2	100
chr1	57283815	57283819	Mil2015|chr1_57283817	2	2	100
chr1	57288086	57288090	Mil2015|chr1_57288088	2	2	100
chr1	57347558	57347562	Kar2015|chr1_57347560	2	2	100
chr1	57406279	57406283	Mil2015|chr1_57406281	2	2	100
chr1	57428129	57428133	Kar2015|chr1_57428131	2	2	100
chr1	57452311	57452315	Kar2015|chr1_57452313	2	2	100
chr1	57470815	57470819	Mil2015|chr1_57470817	2	2	100
chr1	57475370	57475374	Mil2015|chr1_57475372	2	2	100
chr1	57511657	57511661	Kar2015|chr1_57511659	2	2	100
chr1	57560305	57560309	Mil2015|chr1_57560307	2	2	100
chr1	57573979	57573983	Mil2015|chr1_57573981	2	2	100
chr1	57606994	57606998	Mil2015|chr1_57606996	2	2	100
chr1	57611192	57611196	Mil2015|chr1_57611194	2	2	100
chr1	57616724	57616728	Mil2015|chr1_57616726	2	2	100
chr1	57639086	57639090	Mil2015|chr1_57639088	2	2	100
chr1	57649489	57649493	Kar2015|chr1_57649491	2	2	100
chr1	57660090	57660094	Mil2015|chr1_57660092	2	2	100
chr1	57684324	57684328	Kar2015|chr1_57684326	2	2	100
chr1	57697311	57697315	Kar2015|chr1_57697313	2	2	100
chr1	57727561	57727565	Mil2015|chr1_57727563	2	2	100
chr1	57750781	57750785	Mil2015|chr1_57750783	2	2	100
chr1	57754527	57754531	Mil2015|chr1_57754529	2	2	100
chr1	57769344	57769348	Mil2015|chr1_57769346	2	2	100
chr1	57786883	57786887	Mil2015|chr1_57786885	2	2	100
chr1	57792407	57792411	Mil2015|chr1_57792409	2	2	100
chr1	57808919	57808923	Mil2015|chr1_57808921	2	2	100
chr1	57840898	57840902	Mil2015|chr1_57840900	2	2	100
chr1	57846089	57846093	Mil2015|chr1_57846091	2	2	100
chr1	57852075	57852079	Mil2015|chr1_57852077	2	2	100
chr1	57863592	57863596	Mil2015|chr1_57863594	2	2	100
chr1	57922715	57922719	Mil2015|chr1_57922717	2	2	100
chr1	57957587	57957591	Mil2015|chr1_57957589	2	2	100
chr1	57965410	57965414	Mil2015|chr1_57965412	2	2	100
chr1	57999339	57999343	Mil2015|chr1_57999341	2	2	100
chr1	58006911	58006915	Mil2015|chr1_58006913	2	2	100
chr1	58037080	58037084	Mil2015|chr1_58037082	2	2	100
chr1	58048224	58048228	Mil2015|chr1_58048226	2	2	100
chr1	58055400	58055404	Mil2015|chr1_58055402	2	2	100
chr1	58061001	58061005	Mil2015|chr1_58061003	2	2	100
chr1	58115031	58115035	Mil2015|chr1_58115033	2	2	100
chr1	58204067	58204071	Mil2015|chr1_58204069	2	2	100
chr1	58346180	58346184	Kar2015|chr1_58346182	2	2	100
chr1	58408053	58408057	Mil2015|chr1_58408055	2	2	100
chr1	58470352	58470356	Mil2015|chr1_58470354	2	2	100
chr1	58497267	58497271	Kar2015|chr1_58497269	2	2	100
chr1	58687606	58687610	Kar2015|chr1_58687608	2	2	100
chr1	58768298	58768302	Kar2015|chr1_58768300	2	2	100
chr1	58835081	58835085	Mil2015|chr1_58835083	2	2	100
chr1	58851104	58851108	Mil2015|chr1_58851106	2	2	100
chr1	58866769	58866773	Mil2015|chr1_58866771	2	2	100
chr1	58895388	58895392	Mil2015|chr1_58895390	2	2	100
chr1	58901125	58901129	Mil2015|chr1_58901127	2	2	100
chr1	58924732	58924736	Mil2015|chr1_58924734	2	2	100
chr1	59014324	59014328	Mil2015|chr1_59014326	2	2	100
chr1	59054631	59054635	Kar2015|chr1_59054633	2	2	100
chr1	59087299	59087303	Mil2015|chr1_59087301	2	2	100
chr1	59120910	59120914	Mil2015|chr1_59120912	2	2	100
chr1	59129432	59129436	Mil2015|chr1_59129434	2	2	100
chr1	59159619	59159623	Mil2015|chr1_59159621	2	2	100
chr1	59183042	59183046	Mil2015|chr1_59183044	2	2	100
chr1	59223675	59223679	Kar2015|chr1_59223677	2	2	100
chr1	59275558	59275562	Mil2015|chr1_59275560	2	2	100
chr1	59314440	59314444	Kar2015|chr1_59314442	2	2	100
chr1	59448637	59448641	Mil2015|chr1_59448639	2	2	100
chr1	59452964	59452968	Kar2015|chr1_59452966	2	2	100
chr1	59631537	59631541	Kar2015|chr1_59631539	2	2	100
chr1	59650091	59650095	Mil2015|chr1_59650093	2	2	100
chr1	59697484	59697488	Mil2015|chr1_59697486	2	2	100
chr1	59709759	59709763	Mil2015|chr1_59709761	2	2	100
chr1	59728917	59728921	Mil2015|chr1_59728919	2	2	100
chr1	59734096	59734100	Mil2015|chr1_59734098	2	2	100
chr1	59751740	59751744	Mil2015|chr1_59751742	2	2	100
chr1	59755751	59755755	Mil2015|chr1_59755753	2	2	100
chr1	59772852	59772856	Mil2015|chr1_59772854	2	2	100
chr1	59780948	59780952	Kar2015|chr1_59780950	2	2	100
chr1	59795353	59795357	Mil2015|chr1_59795355	2	2	100
chr1	59803538	59803542	Mil2015|chr1_59803540	2	2	100
chr1	59830021	59830025	Mil2015|chr1_59830023	2	2	100
chr1	59842883	59842887	Mil2015|chr1_59842885	2	2	100
chr1	59849405	59849409	Mil2015|chr1_59849407	2	2	100
chr1	59930403	59930407	Mil2015|chr1_59930405	2	2	100
chr1	59936079	59936083	Mil2015|chr1_59936081	2	2	100
chr1	59950810	59950814	Mil2015|chr1_59950812	2	2	100
chr1	59988429	59988433	Mil2015|chr1_59988431	2	2	100
chr1	60020689	60020693	Kar2015|chr1_60020691	2	2	100
chr1	60050306	60050310	Mil2015|chr1_60050308	2	2	100
chr1	60071042	60071046	Mil2015|chr1_60071044	2	2	100
chr1	60084636	60084640	Kar2015|chr1_60084638	2	2	100
chr1	60245250	60245254	Mil2015|chr1_60245252	2	2	100
chr1	60275386	60275390	Mil2015|chr1_60275388	2	2	100
chr1	60301732	60301736	Mil2015|chr1_60301734	2	2	100
chr1	60373254	60373258	Kar2015|chr1_60373256	2	2	100
chr1	60497364	60497368	Kar2015|chr1_60497366	2	2	100
chr1	60533559	60533563	Kar2015|chr1_60533561	2	2	100
chr1	60588545	60588549	Kar2015|chr1_60588547	2	2	100
chr1	60616459	60616463	Kar2015|chr1_60616461	2	2	100
chr1	60730129	60730133	Mil2015|chr1_60730131	2	2	100
chr1	60752939	60752943	Kar2015|chr1_60752941	2	2	100
chr1	60759233	60759237	Mil2015|chr1_60759235	2	2	100
chr1	60806360	60806364	Kar2015|chr1_60806362	2	2	100
chr1	60870453	60870457	Kar2015|chr1_60870455	2	2	100
chr1	60952876	60952880	Kar2015|chr1_60952878	2	2	100
chr1	61019738	61019742	Kar2015|chr1_61019740	2	2	100
chr1	61030263	61030267	Kar2015|chr1_61030265	2	2	100
chr1	61097781	61097785	Mil2015|chr1_61097783	2	2	100
chr1	61123635	61123639	Kar2015|chr1_61123637	2	2	100
chr1	61194569	61194573	Kar2015|chr1_61194571	2	2	100
chr1	61230861	61230865	Mil2015|chr1_61230863	2	2	100
chr1	61264608	61264612	Mil2015|chr1_61264610	2	2	100
chr1	61291807	61291811	Kar2015|chr1_61291809	2	2	100
chr1	61309630	61309634	Kar2015|chr1_61309632	2	2	100
chr1	61500404	61500408	Kar2015|chr1_61500406	2	2	100
chr1	61515104	61515108	Kar2015|chr1_61515106	2	2	100
chr1	61540382	61540386	Kar2015|chr1_61540384	2	2	100
chr1	61543912	61543916	Kar2015|chr1_61543914	2	2	100
chr1	61551390	61551394	Kar2015|chr1_61551392	2	2	100
chr1	61564094	61564098	Kar2015|chr1_61564096	2	2	100
chr1	61581602	61581606	Mil2013_RM|chr1_61581604	2	2	100
chr1	61586971	61586975	Kar2015|chr1_61586973	2	2	100
chr1	61590596	61590600	Kar2015|chr1_61590598	2	2	100
chr1	61659033	61659037	Mil2015|chr1_61659035	2	2	100
chr1	61690835	61690839	Mil2015|chr1_61690837	2	2	100
chr1	61724867	61724871	Mil2015|chr1_61724869	2	2	100
chr1	61733686	61733690	Mil2015|chr1_61733688	2	2	100
chr1	61751680	61751684	Kar2015|chr1_61751682	2	2	100
chr1	61759620	61759624	Kar2015|chr1_61759622	2	2	100
chr1	61812828	61812832	Mil2015|chr1_61812830	2	2	100
chr1	61823650	61823654	Mil2015|chr1_61823652	2	2	100
chr1	61828875	61828879	Kar2015|chr1_61828877	2	2	100
chr1	61832656	61832660	Mil2015|chr1_61832658	2	2	100
chr1	61858825	61858829	Mil2015|chr1_61858827	2	2	100
chr1	61925789	61925793	Mil2015|chr1_61925791	2	2	100
chr1	62026140	62026144	Mil2015|chr1_62026142	2	2	100
chr1	62057346	62057350	Kar2015|chr1_62057348	2	2	100
chr1	62063827	62063831	Mil2015|chr1_62063829	2	2	100
chr1	62068965	62068969	Kar2015|chr1_62068967	2	2	100
chr1	62371846	62371850	Mil2015|chr1_62371848	2	2	100
chr1	62411718	62411722	Mil2015|chr1_62411720	2	2	100
chr1	62626587	62626591	Mil2015|chr1_62626589	2	2	100
chr1	62709015	62709019	Mil2015|chr1_62709017	2	2	100
chr1	62752515	62752519	Kar2015|chr1_62752517	2	2	100
chr1	62760085	62760089	Kar2015|chr1_62760087	2	2	100
chr1	62794448	62794452	Mil2015|chr1_62794450	2	2	100
chr1	62818889	62818893	Mil2015|chr1_62818891	2	2	100
chr1	62840476	62840480	Kar2015|chr1_62840478	2	2	100
chr1	62856668	62856672	Mil2015|chr1_62856670	2	2	100
chr1	62860392	62860396	Mil2015|chr1_62860394	2	2	100
chr1	62881760	62881764	Mil2015|chr1_62881762	2	2	100
chr1	62929075	62929079	Mil2015|chr1_62929077	2	2	100
chr1	62961544	62961548	Mil2015|chr1_62961546	2	2	100
chr1	63060663	63060667	Kar2015|chr1_63060665	2	2	100
chr1	63106559	63106563	Mil2015|chr1_63106561	2	2	100
chr1	63128540	63128544	Mil2015|chr1_63128542	2	2	100
chr1	63142867	63142871	Mil2015|chr1_63142869	2	2	100
chr1	63201792	63201796	Mil2015|chr1_63201794	2	2	100
chr1	63260295	63260299	Kar2015|chr1_63260297	2	2	100
chr1	63320170	63320174	Kar2015|chr1_63320172	2	2	100
chr1	63366123	63366127	Mil2015|chr1_63366125	2	2	100
chr1	63416889	63416893	Mil2015|chr1_63416891	2	2	100
chr1	63432237	63432241	Mil2015|chr1_63432239	2	2	100
chr1	63456707	63456711	Mil2015|chr1_63456709	2	2	100
chr1	63488652	63488656	Kar2015|chr1_63488654	2	2	100
chr1	63552782	63552786	Mil2015|chr1_63552784	2	2	100
chr1	63586306	63586310	Kar2015|chr1_63586308	2	2	100
chr1	63600589	63600593	Mil2015|chr1_63600591	2	2	100
chr1	63625011	63625015	Kar2015|chr1_63625013	2	2	100
chr1	63638796	63638800	Mil2015|chr1_63638798	2	2	100
chr1	63658362	63658366	Mil2015|chr1_63658364	2	2	100
chr1	63692570	63692574	Mil2015|chr1_63692572	2	2	100
chr1	63699065	63699069	Mil2015|chr1_63699067	2	2	100
chr1	63706911	63706915	Mil2015|chr1_63706913	2	2	100
chr1	63765559	63765563	Mil2015|chr1_63765561	2	2	100
chr1	63769757	63769761	Mil2015|chr1_63769759	2	2	100
chr1	63780789	63780793	Mil2015|chr1_63780791	2	2	100
chr1	63849790	63849794	Kar2015|chr1_63849792	2	2	100
chr1	63865017	63865021	Kar2015|chr1_63865019	2	2	100
chr1	63877712	63877716	Mil2013_shared|chr1_63877714	2	2	100
chr1	63895253	63895257	Kar2015|chr1_63895255	2	2	100
chr1	63907907	63907911	Mil2015|chr1_63907909	2	2	100
chr1	63925947	63925951	Mil2015|chr1_63925949	2	2	100
chr1	63962559	63962563	Kar2015|chr1_63962561	2	2	100
chr1	63992709	63992713	Mil2015|chr1_63992711	2	2	100
chr1	64013918	64013922	Kar2015|chr1_64013920	2	2	100
chr1	64032152	64032156	Mil2015|chr1_64032154	2	2	100
chr1	64085410	64085414	Mil2015|chr1_64085412	2	2	100
chr1	64205499	64205503	Kar2015|chr1_64205501	2	2	100
chr1	64224105	64224109	Mil2015|chr1_64224107	2	2	100
chr1	64264787	64264791	Mil2015|chr1_64264789	2	2	100
chr1	64382869	64382873	Mil2015|chr1_64382871	2	2	100
chr1	64391342	64391346	Mil2015|chr1_64391344	2	2	100
chr1	64395793	64395797	Mil2015|chr1_64395795	2	2	100
chr1	64412445	64412449	Mil2015|chr1_64412447	2	2	100
chr1	64427200	64427204	Mil2015|chr1_64427202	2	2	100
chr1	64511696	64511700	Kar2015|chr1_64511698	2	2	100
chr1	64656155	64656159	Mil2015|chr1_64656157	2	2	100
chr1	64680568	64680572	Mil2015|chr1_64680570	2	2	100
chr1	64721713	64721717	Mil2015|chr1_64721715	2	2	100
chr1	64737916	64737920	Mil2015|chr1_64737918	2	2	100
chr1	64745386	64745390	Mil2015|chr1_64745388	2	2	100
chr1	64749447	64749451	Kar2015|chr1_64749449	2	2	100
chr1	64754220	64754224	Mil2015|chr1_64754222	2	2	100
chr1	64804573	64804577	Mil2015|chr1_64804575	2	2	100
chr1	64857519	64857523	Kar2015|chr1_64857521	2	2	100
chr1	64906881	64906885	Mil2015|chr1_64906883	2	2	100
chr1	64954784	64954788	Mil2015|chr1_64954786	2	2	100
chr1	64963597	64963601	Mil2015|chr1_64963599	2	2	100
chr1	64994540	64994544	Mil2015|chr1_64994542	2	2	100
chr1	65068680	65068684	Mil2015|chr1_65068682	2	2	100
chr1	65089146	65089150	Mil2015|chr1_65089148	2	2	100
chr1	65119815	65119819	Kar2015|chr1_65119817	2	2	100
chr1	65163736	65163740	Kar2015|chr1_65163738	2	2	100
chr1	65196364	65196368	Kar2015|chr1_65196366	2	2	100
chr1	65261350	65261354	Kar2015|chr1_65261352	2	2	100
chr1	65427823	65427827	Kar2015|chr1_65427825	2	2	100
chr1	65450864	65450868	Kar2015|chr1_65450866	2	2	100
chr1	65476877	65476881	Kar2015|chr1_65476879	2	2	100
chr1	65553571	65553575	Kar2015|chr1_65553573	2	2	100
chr1	65575617	65575621	Kar2015|chr1_65575619	2	2	100
chr1	65727094	65727098	Kar2015|chr1_65727096	2	2	100
chr1	66123496	66123500	Mil2015|chr1_66123498	2	2	100
chr1	66190763	66190767	Kar2015|chr1_66190765	2	2	100
chr1	66205045	66205049	Mil2015|chr1_66205047	2	2	100
chr1	66233354	66233358	Mil2015|chr1_66233356	2	2	100
chr1	66237716	66237720	Kar2015|chr1_66237718	2	2	100
chr1	66247762	66247766	Kar2015|chr1_66247764	2	2	100
chr1	66291269	66291273	Mil2015|chr1_66291271	2	2	100
chr1	66300364	66300368	Mil2015|chr1_66300366	2	2	100
chr1	66319581	66319585	Mil2015|chr1_66319583	2	2	100
chr1	66325826	66325830	Mil2015|chr1_66325828	2	2	100
chr1	66352220	66352224	Mil2015|chr1_66352222	2	2	100
chr1	66425022	66425026	Kar2015|chr1_66425024	2	2	100
chr1	66429355	66429359	Kar2015|chr1_66429357	2	2	100
chr1	66440697	66440701	Mil2015|chr1_66440699	2	2	100
chr1	66461319	66461323	Kar2015|chr1_66461321	2	2	100
chr1	66489405	66489409	Mil2015|chr1_66489407	2	2	100
chr1	66528473	66528477	Mil2015|chr1_66528475	2	2	100
chr1	66549239	66549243	Mil2015|chr1_66549241	2	2	100
chr1	66570851	66570855	Mil2015|chr1_66570853	2	2	100
chr1	66626091	66626095	Mil2015|chr1_66626093	2	2	100
chr1	66629368	66629372	Mil2015|chr1_66629370	2	2	100
chr1	66635103	66635107	Mil2015|chr1_66635105	2	2	100
chr1	66652945	66652949	Mil2015|chr1_66652947	2	2	100
chr1	66693190	66693194	Mil2015|chr1_66693192	2	2	100
chr1	66727662	66727666	Mil2015|chr1_66727664	2	2	100
chr1	66765757	66765761	Kar2015|chr1_66765759	2	2	100
chr1	66802335	66802339	Kar2015|chr1_66802337	2	2	100
chr1	66839104	66839108	Kar2015|chr1_66839106	2	2	100
chr1	66858449	66858453	Mil2015|chr1_66858451	2	2	100
chr1	66940255	66940259	Mil2013_shared|chr1_66940257	2	2	100
chr1	66970446	66970450	Kar2015|chr1_66970448	2	2	100
chr1	67001944	67001948	Kar2015|chr1_67001946	2	2	100
chr1	67058867	67058871	Kar2015|chr1_67058869	2	2	100
chr1	67089188	67089192	Mil2013_NBR|chr1_67089190	2	2	100
chr1	67129616	67129620	Kar2015|chr1_67129618	2	2	100
chr1	67172398	67172402	Kar2015|chr1_67172400	2	2	100
chr1	67284050	67284054	Mil2015|chr1_67284052	2	2	100
chr1	67302317	67302321	Mil2015|chr1_67302319	2	2	100
chr1	67321514	67321518	Mil2015|chr1_67321516	2	2	100
chr1	67339017	67339021	Mil2015|chr1_67339019	2	2	100
chr1	67346589	67346593	Kar2015|chr1_67346591	2	2	100
chr1	67417055	67417059	Kar2015|chr1_67417057	2	2	100
chr1	67524617	67524621	Mil2015|chr1_67524619	2	2	100
chr1	67564565	67564569	Mil2015|chr1_67564567	2	2	100
chr1	67598158	67598162	Kar2015|chr1_67598160	2	2	100
chr1	67631723	67631727	Mil2015|chr1_67631725	2	2	100
chr1	67706663	67706667	Kar2015|chr1_67706665	2	2	100
chr1	67712724	67712728	Mil2015|chr1_67712726	2	2	100
chr1	67769948	67769952	Kar2015|chr1_67769950	2	2	100
chr1	67792429	67792433	Kar2015|chr1_67792431	2	2	100
chr1	67807123	67807127	Kar2015|chr1_67807125	2	2	100
chr1	67832526	67832530	Mil2015|chr1_67832528	2	2	100
chr1	67893406	67893410	Mil2015|chr1_67893408	2	2	100
chr1	68005669	68005673	Mil2018|chr1_68005671	2	2	100
chr1	68022535	68022539	Mil2015|chr1_68022537	2	2	100
chr1	68044823	68044827	Mil2015|chr1_68044825	2	2	100
chr1	68160108	68160112	Mil2015|chr1_68160110	2	2	100
chr1	68235117	68235121	Mil2018|chr1_68235119	2	2	100
chr1	68300658	68300662	Kar2015|chr1_68300660	2	2	100
chr1	68328182	68328186	Mil2015|chr1_68328184	2	2	100
chr1	68387103	68387107	Kar2015|chr1_68387105	2	2	100
chr1	68413432	68413436	Mil2015|chr1_68413434	2	2	100
chr1	68434958	68434962	Mil2015|chr1_68434960	2	2	100
chr1	68444420	68444424	Mil2015|chr1_68444422	2	2	100
chr1	68586470	68586474	Mil2015|chr1_68586472	2	2	100
chr1	68602808	68602812	Kar2015|chr1_68602810	2	2	100
chr1	68606649	68606653	Mil2015|chr1_68606651	2	2	100
chr1	68627613	68627617	Mil2015|chr1_68627615	2	2	100
chr1	68651252	68651256	Mil2015|chr1_68651254	2	2	100
chr1	68671366	68671370	Mil2015|chr1_68671368	2	2	100
chr1	68745201	68745205	Mil2015|chr1_68745203	2	2	100
chr1	68765036	68765040	Kar2015|chr1_68765038	2	2	100
chr1	68786011	68786015	Mil2018|chr1_68786013	2	2	100
chr1	68828545	68828549	Mil2015|chr1_68828547	2	2	100
chr1	68873763	68873767	Mil2015|chr1_68873765	2	2	100
chr1	68893023	68893027	Kar2015|chr1_68893025	2	2	100
chr1	68954881	68954885	Kar2015|chr1_68954883	2	2	100
chr1	69012721	69012725	Kar2015|chr1_69012723	2	2	100
chr1	69016833	69016837	Kar2015|chr1_69016835	2	2	100
chr1	69027260	69027264	Mil2015|chr1_69027262	2	2	100
chr1	69046188	69046192	Mil2015|chr1_69046190	2	2	100
chr1	69068463	69068467	Kar2015|chr1_69068465	2	2	100
chr1	69077994	69077998	Kar2015|chr1_69077996	2	2	100
chr1	69092256	69092260	Kar2015|chr1_69092258	2	2	100
chr1	69096473	69096477	Mil2015|chr1_69096475	2	2	100
chr1	69109467	69109471	Mil2015|chr1_69109469	2	2	100
chr1	69137304	69137308	Mil2015|chr1_69137306	2	2	100
chr1	69143520	69143524	Kar2015|chr1_69143522	2	2	100
chr1	69163846	69163850	Mil2015|chr1_69163848	2	2	100
chr1	69210955	69210959	Mil2015|chr1_69210957	2	2	100
chr1	69300516	69300520	Mil2015|chr1_69300518	2	2	100
chr1	69304474	69304478	Mil2015|chr1_69304476	2	2	100
chr1	69307897	69307901	Mil2015|chr1_69307899	2	2	100
chr1	69327578	69327582	Kar2015|chr1_69327580	2	2	100
chr1	69371491	69371495	Mil2015|chr1_69371493	2	2	100
chr1	69433294	69433298	Mil2015|chr1_69433296	2	2	100
chr1	69448538	69448542	Kar2015|chr1_69448540	2	2	100
chr1	69477979	69477983	Mil2015|chr1_69477981	2	2	100
chr1	69515890	69515894	Kar2015|chr1_69515892	2	2	100
chr1	69528020	69528024	Mil2015|chr1_69528022	2	2	100
chr1	69531995	69531999	Mil2015|chr1_69531997	2	2	100
chr1	69545143	69545147	Mil2015|chr1_69545145	2	2	100
chr1	69575992	69575996	Mil2015|chr1_69575994	2	2	100
chr1	69585519	69585523	Mil2015|chr1_69585521	2	2	100
chr1	69614810	69614814	Mil2015|chr1_69614812	2	2	100
chr1	69625636	69625640	Kar2015|chr1_69625638	2	2	100
chr1	69635712	69635716	Mil2015|chr1_69635714	2	2	100
chr1	69642454	69642458	Kar2015|chr1_69642456	2	2	100
chr1	69658402	69658406	Kar2015|chr1_69658404	2	2	100
chr1	69741865	69741869	Kar2015|chr1_69741867	2	2	100
chr1	69757468	69757472	Mil2015|chr1_69757470	2	2	100
chr1	69763614	69763618	Mil2015|chr1_69763616	2	2	100
chr1	69768577	69768581	Mil2015|chr1_69768579	2	2	100
chr1	69803556	69803560	Mil2015|chr1_69803558	2	2	100
chr1	69830965	69830969	Kar2015|chr1_69830967	2	2	100
chr1	69878819	69878823	Mil2015|chr1_69878821	2	2	100
chr1	69954710	69954714	Kar2015|chr1_69954712	2	2	100
chr1	69968220	69968224	Kar2015|chr1_69968222	2	2	100
chr1	69985028	69985032	Mil2015|chr1_69985030	2	2	100
chr1	70013564	70013568	Kar2015|chr1_70013566	2	2	100
chr1	70036519	70036523	Mil2015|chr1_70036521	2	2	100
chr1	70051911	70051915	Mil2015|chr1_70051913	2	2	100
chr1	70056913	70056917	Kar2015|chr1_70056915	2	2	100
chr1	70067561	70067565	Mil2015|chr1_70067563	2	2	100
chr1	70108802	70108806	Kar2015|chr1_70108804	2	2	100
chr1	70150449	70150453	Mil2015|chr1_70150451	2	2	100
chr1	70159023	70159027	Mil2013_NBR|chr1_70159025	2	2	100
chr1	70162352	70162356	Kar2015|chr1_70162354	2	2	100
chr1	70195384	70195388	Kar2015|chr1_70195386	2	2	100
chr1	70251923	70251927	Mil2015|chr1_70251925	2	2	100
chr1	70267238	70267242	Mil2015|chr1_70267240	2	2	100
chr1	70323342	70323346	Kar2015|chr1_70323344	2	2	100
chr1	70389831	70389835	Mil2015|chr1_70389833	2	2	100
chr1	70472581	70472585	Mil2015|chr1_70472583	2	2	100
chr1	70509894	70509898	Mil2015|chr1_70509896	2	2	100
chr1	70515759	70515763	Mil2015|chr1_70515761	2	2	100
chr1	70524965	70524969	Kar2015|chr1_70524967	2	2	100
chr1	70559370	70559374	Mil2015|chr1_70559372	2	2	100
chr1	70569286	70569290	Kar2015|chr1_70569288	2	2	100
chr1	70590182	70590186	Mil2015|chr1_70590184	2	2	100
chr1	70654809	70654813	Mil2015|chr1_70654811	2	2	100
chr1	70668168	70668172	Mil2015|chr1_70668170	2	2	100
chr1	70706381	70706385	Mil2013_RM|chr1_70706383	2	2	100
chr1	70747834	70747838	Mil2015|chr1_70747836	2	2	100
chr1	70773121	70773125	Mil2015|chr1_70773123	2	2	100
chr1	70803724	70803728	Mil2015|chr1_70803726	2	2	100
chr1	70855659	70855663	Kar2015|chr1_70855661	2	2	100
chr1	70955201	70955205	Mil2015|chr1_70955203	2	2	100
chr1	70973380	70973384	Mil2015|chr1_70973382	2	2	100
chr1	71007203	71007207	Mil2013_RM|chr1_71007205	2	2	100
chr1	71027272	71027276	Mil2015|chr1_71027274	2	2	100
chr1	71086717	71086721	Kar2015|chr1_71086719	2	2	100
chr1	71094825	71094829	Kar2015|chr1_71094827	2	2	100
chr1	71107692	71107696	Kar2015|chr1_71107694	2	2	100
chr1	71215542	71215546	Kar2015|chr1_71215544	2	2	100
chr1	71238738	71238742	Kar2015|chr1_71238740	2	2	100
chr1	71275276	71275280	Kar2015|chr1_71275278	2	2	100
chr1	71357642	71357646	Kar2015|chr1_71357644	2	2	100
chr1	71363809	71363813	Mil2015|chr1_71363811	2	2	100
chr1	71387931	71387935	Kar2015|chr1_71387933	2	2	100
chr1	71464368	71464372	Mil2015|chr1_71464370	2	2	100
chr1	71468230	71468234	Mil2015|chr1_71468232	2	2	100
chr1	71476241	71476245	Mil2015|chr1_71476243	2	2	100
chr1	71481619	71481623	Kar2015|chr1_71481621	2	2	100
chr1	71503549	71503553	Mil2015|chr1_71503551	2	2	100
chr1	71562425	71562429	Mil2018|chr1_71562427	2	2	100
chr1	71566749	71566753	Mil2015|chr1_71566751	2	2	100
chr1	71709888	71709892	Kar2015|chr1_71709890	2	2	100
chr1	71808025	71808029	Mil2015|chr1_71808027	2	2	100
chr1	71817131	71817135	Kar2015|chr1_71817133	2	2	100
chr1	71853554	71853558	Mil2015|chr1_71853556	2	2	100
chr1	71866151	71866155	Mil2015|chr1_71866153	2	2	100
chr1	71920968	71920972	Mil2015|chr1_71920970	2	2	100
chr1	71955468	71955472	Mil2015|chr1_71955470	2	2	100
chr1	71969111	71969115	Mil2015|chr1_71969113	2	2	100
chr1	71992961	71992965	Mil2015|chr1_71992963	2	2	100
chr1	72009750	72009754	Mil2015|chr1_72009752	2	2	100
chr1	72033400	72033404	Mil2015|chr1_72033402	2	2	100
chr1	72040932	72040936	Mil2015|chr1_72040934	2	2	100
chr1	72058842	72058846	Mil2015|chr1_72058844	2	2	100
chr1	72152520	72152524	Mil2015|chr1_72152522	2	2	100
chr1	72238100	72238104	Mil2015|chr1_72238102	2	2	100
chr1	72288959	72288963	Mil2015|chr1_72288961	2	2	100
chr1	72293432	72293436	Mil2015|chr1_72293434	2	2	100
chr1	72298264	72298268	Kar2015|chr1_72298266	2	2	100
chr1	72301573	72301577	Kar2015|chr1_72301575	2	2	100
chr1	72313437	72313441	Kar2015|chr1_72313439	2	2	100
chr1	72318952	72318956	Mil2015|chr1_72318954	2	2	100
chr1	72324252	72324256	Mil2015|chr1_72324254	2	2	100
chr1	72333940	72333944	Kar2015|chr1_72333942	2	2	100
chr1	72372231	72372235	Kar2015|chr1_72372233	2	2	100
chr1	72384157	72384161	Kar2015|chr1_72384159	2	2	100
chr1	72412571	72412575	Mil2015|chr1_72412573	2	2	100
chr1	72443160	72443164	Mil2015|chr1_72443162	2	2	100
chr1	72495610	72495614	Mil2015|chr1_72495612	2	2	100
chr1	72519336	72519340	Kar2015|chr1_72519338	2	2	100
chr1	72832544	72832548	Kar2015|chr1_72832546	2	2	100
chr1	72842900	72842904	Kar2015|chr1_72842902	2	2	100
chr1	72850195	72850199	Kar2015|chr1_72850197	2	2	100
chr1	72941813	72941817	Kar2015|chr1_72941815	2	2	100
chr1	72995061	72995065	Kar2015|chr1_72995063	2	2	100
chr1	73008542	73008546	Kar2015|chr1_73008544	2	2	100
chr1	73065287	73065291	Kar2015|chr1_73065289	2	2	100
chr1	73099681	73099685	Kar2015|chr1_73099683	2	2	100
chr1	73134890	73134894	Kar2015|chr1_73134892	2	2	100
chr1	73173757	73173761	Mil2015|chr1_73173759	2	2	100
chr1	73292067	73292071	Mil2015|chr1_73292069	2	2	100
chr1	73313809	73313813	Mil2015|chr1_73313811	2	2	100
chr1	73327711	73327715	Mil2015|chr1_73327713	2	2	100
chr1	73370930	73370934	Mil2015|chr1_73370932	2	2	100
chr1	73375833	73375837	Kar2015|chr1_73375835	2	2	100
chr1	73381753	73381757	Kar2015|chr1_73381755	2	2	100
chr1	73416225	73416229	Kar2015|chr1_73416227	2	2	100
chr1	73493778	73493782	Kar2015|chr1_73493780	2	2	100
chr1	73527297	73527301	Kar2015|chr1_73527299	2	2	100
chr1	73655260	73655264	Mil2015|chr1_73655262	2	2	100
chr1	73737114	73737118	Kar2015|chr1_73737116	2	2	100
chr1	73799831	73799835	Mil2015|chr1_73799833	2	2	100
chr1	73811964	73811968	Mil2015|chr1_73811966	2	2	100
chr1	73885458	73885462	Mil2015|chr1_73885460	2	2	100
chr1	73933842	73933846	Mil2015|chr1_73933844	2	2	100
chr1	73956105	73956109	Mil2015|chr1_73956107	2	2	100
chr1	73965789	73965793	Mil2015|chr1_73965791	2	2	100
chr1	74055482	74055486	Mil2015|chr1_74055484	2	2	100
chr1	74061576	74061580	Mil2015|chr1_74061578	2	2	100
chr1	74160690	74160694	Mil2015|chr1_74160692	2	2	100
chr1	74173866	74173870	Mil2015|chr1_74173868	2	2	100
chr1	74212286	74212290	Mil2015|chr1_74212288	2	2	100
chr1	74263820	74263824	Kar2015|chr1_74263822	2	2	100
chr1	74272092	74272096	Mil2015|chr1_74272094	2	2	100
chr1	74329864	74329868	Mil2015|chr1_74329866	2	2	100
chr1	74376371	74376375	Mil2015|chr1_74376373	2	2	100
chr1	74385848	74385852	Kar2015|chr1_74385850	2	2	100
chr1	74402689	74402693	Mil2015|chr1_74402691	2	2	100
chr1	74409386	74409390	Mil2015|chr1_74409388	2	2	100
chr1	74443763	74443767	Mil2015|chr1_74443765	2	2	100
chr1	74479138	74479142	Mil2015|chr1_74479140	2	2	100
chr1	74510759	74510763	Mil2015|chr1_74510761	2	2	100
chr1	74514334	74514338	Mil2015|chr1_74514336	2	2	100
chr1	74556423	74556427	Mil2015|chr1_74556425	2	2	100
chr1	74561897	74561901	Mil2015|chr1_74561899	2	2	100
chr1	74586477	74586481	Kar2015|chr1_74586479	2	2	100
chr1	74606690	74606694	Kar2015|chr1_74606692	2	2	100
chr1	74680322	74680326	Mil2015|chr1_74680324	2	2	100
chr1	74854858	74854862	Mil2015|chr1_74854860	2	2	100
chr1	74860054	74860058	Kar2015|chr1_74860056	2	2	100
chr1	74864674	74864678	Kar2015|chr1_74864676	2	2	100
chr1	74897943	74897947	Mil2015|chr1_74897945	2	2	100
chr1	74928330	74928334	Kar2015|chr1_74928332	2	2	100
chr1	74945688	74945692	Kar2015|chr1_74945690	2	2	100
chr1	75014235	75014239	Mil2015|chr1_75014237	2	2	100
chr1	75041117	75041121	Mil2015|chr1_75041119	2	2	100
chr1	75084756	75084760	Mil2015|chr1_75084758	2	2	100
chr1	75111535	75111539	Kar2015|chr1_75111537	2	2	100
chr1	75177268	75177272	Mil2015|chr1_75177270	2	2	100
chr1	75345811	75345815	Kar2015|chr1_75345813	2	2	100
chr1	75481463	75481467	Kar2015|chr1_75481465	2	2	100
chr1	75492011	75492015	Kar2015|chr1_75492013	2	2	100
chr1	75557559	75557563	Mil2015|chr1_75557561	2	2	100
chr1	75563305	75563309	Mil2015|chr1_75563307	2	2	100
chr1	75572058	75572062	Mil2015|chr1_75572060	2	2	100
chr1	75586358	75586362	Kar2015|chr1_75586360	2	2	100
chr1	75601257	75601261	Mil2015|chr1_75601259	2	2	100
chr1	75614694	75614698	Mil2015|chr1_75614696	2	2	100
chr1	75652288	75652292	Mil2015|chr1_75652290	2	2	100
chr1	75704081	75704085	Mil2015|chr1_75704083	2	2	100
chr1	75750280	75750284	Kar2015|chr1_75750282	2	2	100
chr1	75810998	75811002	Mil2015|chr1_75811000	2	2	100
chr1	75830670	75830674	Kar2015|chr1_75830672	2	2	100
chr1	75874311	75874315	Kar2015|chr1_75874313	2	2	100
chr1	76118099	76118103	Mil2015|chr1_76118101	2	2	100
chr1	76147426	76147430	Mil2015|chr1_76147428	2	2	100
chr1	76247751	76247755	Kar2015|chr1_76247753	2	2	100
chr1	76323609	76323613	Mil2015|chr1_76323611	2	2	100
chr1	76338603	76338607	Kar2015|chr1_76338605	2	2	100
chr1	76350799	76350803	Mil2015|chr1_76350801	2	2	100
chr1	76369549	76369553	Mil2015|chr1_76369551	2	2	100
chr1	76428170	76428174	Mil2015|chr1_76428172	2	2	100
chr1	76458513	76458517	Mil2015|chr1_76458515	2	2	100
chr1	76592927	76592931	Mil2015|chr1_76592929	2	2	100
chr1	76640674	76640678	Mil2015|chr1_76640676	2	2	100
chr1	76685298	76685302	Mil2015|chr1_76685300	2	2	100
chr1	76850069	76850073	Kar2015|chr1_76850071	2	2	100
chr1	76905386	76905390	Kar2015|chr1_76905388	2	2	100
chr1	77014526	77014530	Kar2015|chr1_77014528	2	2	100
chr1	77193248	77193252	Kar2015|chr1_77193250	2	2	100
chr1	77212420	77212424	Kar2015|chr1_77212422	2	2	100
chr1	77356346	77356350	Kar2015|chr1_77356348	2	2	100
chr1	77451750	77451754	Kar2015|chr1_77451752	2	2	100
chr1	77622039	77622043	Kar2015|chr1_77622041	2	2	100
chr1	77654673	77654677	Kar2015|chr1_77654675	2	2	100
chr1	77680333	77680337	Mil2018|chr1_77680335	2	2	100
chr1	77761280	77761284	Mil2015|chr1_77761282	2	2	100
chr1	77812546	77812550	Mil2015|chr1_77812548	2	2	100
chr1	77818740	77818744	Mil2015|chr1_77818742	2	2	100
chr1	77910100	77910104	Mil2015|chr1_77910102	2	2	100
chr1	77992990	77992994	Kar2015|chr1_77992992	2	2	100
chr1	78025437	78025441	Kar2015|chr1_78025439	2	2	100
chr1	78293772	78293776	Kar2015|chr1_78293774	2	2	100
chr1	79014580	79014584	Mil2015|chr1_79014582	2	2	100
chr1	79042612	79042616	Mil2015|chr1_79042614	2	2	100
chr1	79059548	79059552	Mil2015|chr1_79059550	2	2	100
chr1	79136556	79136560	Mil2015|chr1_79136558	2	2	100
chr1	79227108	79227112	Mil2015|chr1_79227110	2	2	100
chr1	79306810	79306814	Mil2015|chr1_79306812	2	2	100
chr1	79325185	79325189	Mil2015|chr1_79325187	2	2	100
chr1	79329544	79329548	Kar2015|chr1_79329546	2	2	100
chr1	79349227	79349231	Mil2015|chr1_79349229	2	2	100
chr1	79359460	79359464	Mil2015|chr1_79359462	2	2	100
chr1	79389912	79389916	Mil2015|chr1_79389914	2	2	100
chr1	79433073	79433077	Mil2015|chr1_79433075	2	2	100
chr1	79443220	79443224	Mil2015|chr1_79443222	2	2	100
chr1	79455297	79455301	Kar2015|chr1_79455299	2	2	100
chr1	79485959	79485963	Mil2015|chr1_79485961	2	2	100
chr1	79496707	79496711	Mil2015|chr1_79496709	2	2	100
chr1	79514288	79514292	Mil2015|chr1_79514290	2	2	100
chr1	79521633	79521637	Mil2015|chr1_79521635	2	2	100
chr1	79630744	79630748	Kar2015|chr1_79630746	2	2	100
chr1	79743113	79743117	Mil2015|chr1_79743115	2	2	100
chr1	79750589	79750593	Mil2015|chr1_79750591	2	2	100
chr1	79767818	79767822	Mil2015|chr1_79767820	2	2	100
chr1	79911500	79911504	Mil2015|chr1_79911502	2	2	100
chr1	80042145	80042149	Mil2015|chr1_80042147	2	2	100
chr1	80065240	80065244	Mil2015|chr1_80065242	2	2	100
chr1	80103305	80103309	Kar2015|chr1_80103307	2	2	100
chr1	80129652	80129656	Mil2015|chr1_80129654	2	2	100
chr1	80136176	80136180	Mil2015|chr1_80136178	2	2	100
chr1	80214770	80214774	Kar2015|chr1_80214772	2	2	100
chr1	80218921	80218925	Kar2015|chr1_80218923	2	2	100
chr1	80237827	80237831	Mil2015|chr1_80237829	2	2	100
chr1	80283748	80283752	Mil2015|chr1_80283750	2	2	100
chr1	80433896	80433900	Mil2015|chr1_80433898	2	2	100
chr1	80451847	80451851	Mil2015|chr1_80451849	2	2	100
chr1	80530704	80530708	Mil2015|chr1_80530706	2	2	100
chr1	80567957	80567961	Mil2015|chr1_80567959	2	2	100
chr1	80577972	80577976	Mil2015|chr1_80577974	2	2	100
chr1	80684156	80684160	Mil2015|chr1_80684158	2	2	100
chr1	80743818	80743822	Mil2015|chr1_80743820	2	2	100
chr1	80768062	80768066	Mil2015|chr1_80768064	2	2	100
chr1	80868834	80868838	Mil2015|chr1_80868836	2	2	100
chr1	80887175	80887179	Mil2015|chr1_80887177	2	2	100
chr1	80901321	80901325	Kar2015|chr1_80901323	2	2	100
chr1	80913227	80913231	Mil2015|chr1_80913229	2	2	100
chr1	80964434	80964438	Mil2015|chr1_80964436	2	2	100
chr1	80983773	80983777	Mil2015|chr1_80983775	2	2	100
chr1	80998961	80998965	Mil2015|chr1_80998963	2	2	100
chr1	81024460	81024464	Mil2015|chr1_81024462	2	2	100
chr1	81059480	81059484	Kar2015|chr1_81059482	2	2	100
chr1	81128123	81128127	Mil2015|chr1_81128125	2	2	100
chr1	81144391	81144395	Mil2015|chr1_81144393	2	2	100
chr1	81149073	81149077	Mil2015|chr1_81149075	2	2	100
chr1	81153823	81153827	Mil2015|chr1_81153825	2	2	100
chr1	81170891	81170895	Mil2015|chr1_81170893	2	2	100
chr1	81239194	81239198	Mil2015|chr1_81239196	2	2	100
chr1	81313573	81313577	Mil2015|chr1_81313575	2	2	100
chr1	81396008	81396012	Kar2015|chr1_81396010	2	2	100
chr1	81450659	81450663	Kar2015|chr1_81450661	2	2	100
chr1	81489498	81489502	Mil2015|chr1_81489500	2	2	100
chr1	81542374	81542378	Kar2015|chr1_81542376	2	2	100
chr1	81560678	81560682	Kar2015|chr1_81560680	2	2	100
chr1	81565804	81565808	Mil2015|chr1_81565806	2	2	100
chr1	81809991	81809995	Mil2015|chr1_81809993	2	2	100
chr1	82315025	82315029	Mil2015|chr1_82315027	2	2	100
chr1	82363367	82363371	Mil2015|chr1_82363369	2	2	100
chr1	82366922	82366926	Mil2015|chr1_82366924	2	2	100
chr1	82539250	82539254	Mil2018|chr1_82539252	2	2	100
chr1	82792724	82792728	Mil2015|chr1_82792726	2	2	100
chr1	82869295	82869299	Mil2015|chr1_82869297	2	2	100
chr1	82931748	82931752	Mil2015|chr1_82931750	2	2	100
chr1	82970488	82970492	Kar2015|chr1_82970490	2	2	100
chr1	83077263	83077267	Kar2015|chr1_83077265	2	2	100
chr1	83169445	83169449	Mil2015|chr1_83169447	2	2	100
chr1	83257817	83257821	Kar2015|chr1_83257819	2	2	100
chr1	83345360	83345364	Kar2015|chr1_83345362	2	2	100
chr1	83380171	83380175	Mil2015|chr1_83380173	2	2	100
chr1	83389516	83389520	Mil2015|chr1_83389518	2	2	100
chr1	83405013	83405017	Mil2015|chr1_83405015	2	2	100
chr1	83431373	83431377	Mil2015|chr1_83431375	2	2	100
chr1	83442360	83442364	Mil2015|chr1_83442362	2	2	100
chr1	83487198	83487202	Mil2015|chr1_83487200	2	2	100
chr1	83519494	83519498	Kar2015|chr1_83519496	2	2	100
chr1	83552004	83552008	Mil2015|chr1_83552006	2	2	100
chr1	83645892	83645896	Kar2015|chr1_83645894	2	2	100
chr1	83667914	83667918	Kar2015|chr1_83667916	2	2	100
chr1	83756297	83756301	Kar2015|chr1_83756299	2	2	100
chr1	83802489	83802493	Kar2015|chr1_83802491	2	2	100
chr1	83863216	83863220	Kar2015|chr1_83863218	2	2	100
chr1	83930210	83930214	Mil2015|chr1_83930212	2	2	100
chr1	83966141	83966145	Kar2015|chr1_83966143	2	2	100
chr1	84013840	84013844	Mil2015|chr1_84013842	2	2	100
chr1	84039729	84039733	Mil2015|chr1_84039731	2	2	100
chr1	84176248	84176252	Mil2015|chr1_84176250	2	2	100
chr1	84293467	84293471	Mil2015|chr1_84293469	2	2	100
chr1	84321774	84321778	Mil2015|chr1_84321776	2	2	100
chr1	84331642	84331646	Mil2015|chr1_84331644	2	2	100
chr1	84353634	84353638	Mil2015|chr1_84353636	2	2	100
chr1	84369490	84369494	Mil2013_RM|chr1_84369492	2	2	100
chr1	84385997	84386001	Mil2015|chr1_84385999	2	2	100
chr1	84403754	84403758	Kar2015|chr1_84403756	2	2	100
chr1	84426842	84426846	Mil2015|chr1_84426844	2	2	100
chr1	84453413	84453417	Kar2015|chr1_84453415	2	2	100
chr1	84488795	84488799	Kar2015|chr1_84488797	2	2	100
chr1	84519215	84519219	Mil2015|chr1_84519217	2	2	100
chr1	84580363	84580367	Mil2015|chr1_84580365	2	2	100
chr1	84585325	84585329	Mil2015|chr1_84585327	2	2	100
chr1	84616173	84616177	Mil2015|chr1_84616175	2	2	100
chr1	84739313	84739317	Mil2015|chr1_84739315	2	2	100
chr1	84809338	84809342	Mil2015|chr1_84809340	2	2	100
chr1	84933618	84933622	Mil2015|chr1_84933620	2	2	100
chr1	85017883	85017887	Mil2015|chr1_85017885	2	2	100
chr1	85088758	85088762	Kar2015|chr1_85088760	2	2	100
chr1	85150157	85150161	Mil2015|chr1_85150159	2	2	100
chr1	85179595	85179599	Mil2015|chr1_85179597	2	2	100
chr1	85186065	85186069	Mil2015|chr1_85186067	2	2	100
chr1	85204493	85204497	Mil2015|chr1_85204495	2	2	100
chr1	85351644	85351648	Mil2015|chr1_85351646	2	2	100
chr1	85483592	85483596	Mil2015|chr1_85483594	2	2	100
chr1	85535323	85535327	Mil2015|chr1_85535325	2	2	100
chr1	85591182	85591186	Kar2015|chr1_85591184	2	2	100
chr1	85783432	85783436	Mil2015|chr1_85783434	2	2	100
chr1	85837763	85837767	Mil2015|chr1_85837765	2	2	100
chr1	85844754	85844758	Mil2015|chr1_85844756	2	2	100
chr1	85893439	85893443	Kar2015|chr1_85893441	2	2	100
chr1	85907519	85907523	Mil2013_shared|chr1_85907521	2	2	100
chr1	85933560	85933564	Kar2015|chr1_85933562	2	2	100
chr1	85961721	85961725	Kar2015|chr1_85961723	2	2	100
chr1	86027940	86027944	Mil2015|chr1_86027942	2	2	100
chr1	86266431	86266435	Mil2013_shared|chr1_86266433	2	2	100
chr1	86323353	86323357	Kar2015|chr1_86323355	2	2	100
chr1	86349005	86349009	Mil2013_NBR|chr1_86349007	2	2	100
chr1	86412647	86412651	Mil2015|chr1_86412649	2	2	100
chr1	86421447	86421451	Mil2015|chr1_86421449	2	2	100
chr1	86448756	86448760	Mil2015|chr1_86448758	2	2	100
chr1	86464655	86464659	Mil2015|chr1_86464657	2	2	100
chr1	86468769	86468773	Mil2015|chr1_86468771	2	2	100
chr1	86561128	86561132	Kar2015|chr1_86561130	2	2	100
chr1	86576464	86576468	Mil2018|chr1_86576466	2	2	100
chr1	86610052	86610056	Mil2015|chr1_86610054	2	2	100
chr1	86623041	86623045	Mil2013_RM|chr1_86623043	2	2	100
chr1	86702171	86702175	Kar2015|chr1_86702173	2	2	100
chr1	86806916	86806920	Kar2015|chr1_86806918	2	2	100
chr1	86874153	86874157	Kar2015|chr1_86874155	2	2	100
chr1	86944769	86944773	Mil2015|chr1_86944771	2	2	100
chr1	87004836	87004840	Kar2015|chr1_87004838	2	2	100
chr1	87009179	87009183	Mil2013_NBR|chr1_87009181	2	2	100
chr1	87033057	87033061	Kar2015|chr1_87033059	2	2	100
chr1	87079272	87079276	Kar2015|chr1_87079274	2	2	100
chr1	87096456	87096460	Kar2015|chr1_87096458	2	2	100
chr1	87116666	87116670	Mil2015|chr1_87116668	2	2	100
chr1	87142654	87142658	Kar2015|chr1_87142656	2	2	100
chr1	87170883	87170887	Kar2015|chr1_87170885	2	2	100
chr1	87189069	87189073	Mil2015|chr1_87189071	2	2	100
chr1	87199468	87199472	Mil2015|chr1_87199470	2	2	100
chr1	87210427	87210431	Mil2015|chr1_87210429	2	2	100
chr1	87275540	87275544	Mil2015|chr1_87275542	2	2	100
chr1	87311906	87311910	Kar2015|chr1_87311908	2	2	100
chr1	87596085	87596089	Mil2015|chr1_87596087	2	2	100
chr1	87703042	87703046	Mil2015|chr1_87703044	2	2	100
chr1	87733025	87733029	Mil2015|chr1_87733027	2	2	100
chr1	87811540	87811544	Mil2015|chr1_87811542	2	2	100
chr1	87877940	87877944	Kar2015|chr1_87877942	2	2	100
chr1	87918002	87918006	Mil2015|chr1_87918004	2	2	100
chr1	87978662	87978666	Mil2013_RM|chr1_87978664	2	2	100
chr1	87982988	87982992	Mil2015|chr1_87982990	2	2	100
chr1	88064718	88064722	Mil2013_RM|chr1_88064720	2	2	100
chr1	88088572	88088576	Kar2015|chr1_88088574	2	2	100
chr1	88202259	88202263	Mil2015|chr1_88202261	2	2	100
chr1	88221099	88221103	Mil2015|chr1_88221101	2	2	100
chr1	88258858	88258862	Kar2015|chr1_88258860	2	2	100
chr1	88267916	88267920	Kar2015|chr1_88267918	2	2	100
chr1	88281859	88281863	Kar2015|chr1_88281861	2	2	100
chr1	88375652	88375656	Mil2015|chr1_88375654	2	2	100
chr1	88417894	88417898	Mil2015|chr1_88417896	2	2	100
chr1	88424362	88424366	Mil2015|chr1_88424364	2	2	100
chr1	88445451	88445455	Mil2015|chr1_88445453	2	2	100
chr1	88470520	88470524	Kar2015|chr1_88470522	2	2	100
chr1	88503411	88503415	Kar2015|chr1_88503413	2	2	100
chr1	88533764	88533768	Kar2015|chr1_88533766	2	2	100
chr1	88547302	88547306	Mil2015|chr1_88547304	2	2	100
chr1	88564410	88564414	Mil2015|chr1_88564412	2	2	100
chr1	88590343	88590347	Mil2013_NBR|chr1_88590345	2	2	100
chr1	88599735	88599739	Mil2015|chr1_88599737	2	2	100
chr1	88607508	88607512	Kar2015|chr1_88607510	2	2	100
chr1	88664167	88664171	Kar2015|chr1_88664169	2	2	100
chr1	88914832	88914836	Mil2015|chr1_88914834	2	2	100
chr1	88942366	88942370	Mil2015|chr1_88942368	2	2	100
chr1	89072085	89072089	Kar2015|chr1_89072087	2	2	100
chr1	89150572	89150576	Mil2015|chr1_89150574	2	2	100
chr1	89454722	89454726	Mil2015|chr1_89454724	2	2	100
chr1	89462486	89462490	Kar2015|chr1_89462488	2	2	100
chr1	89467011	89467015	Mil2015|chr1_89467013	2	2	100
chr1	89494468	89494472	Kar2015|chr1_89494470	2	2	100
chr1	89543348	89543352	Mil2015|chr1_89543350	2	2	100
chr1	89591725	89591729	Kar2015|chr1_89591727	2	2	100
chr1	89624930	89624934	Mil2015|chr1_89624932	2	2	100
chr1	89628259	89628263	Kar2015|chr1_89628261	2	2	100
chr1	89647754	89647758	Mil2015|chr1_89647756	2	2	100
chr1	89711301	89711305	Mil2015|chr1_89711303	2	2	100
chr1	89714984	89714988	Mil2015|chr1_89714986	2	2	100
chr1	89719164	89719168	Kar2015|chr1_89719166	2	2	100
chr1	89807439	89807443	Kar2015|chr1_89807441	2	2	100
chr1	89818226	89818230	Mil2015|chr1_89818228	2	2	100
chr1	89832535	89832539	Mil2015|chr1_89832537	2	2	100
chr1	89849076	89849080	Mil2015|chr1_89849078	2	2	100
chr1	89880489	89880493	Mil2015|chr1_89880491	2	2	100
chr1	89931424	89931428	Mil2015|chr1_89931426	2	2	100
chr1	89949603	89949607	Mil2015|chr1_89949605	2	2	100
chr1	89967838	89967842	Mil2015|chr1_89967840	2	2	100
chr1	89985181	89985185	Mil2015|chr1_89985183	2	2	100
chr1	90001105	90001109	Mil2015|chr1_90001107	2	2	100
chr1	90043370	90043374	Mil2015|chr1_90043372	2	2	100
chr1	90053482	90053486	Mil2015|chr1_90053484	2	2	100
chr1	90074125	90074129	Mil2015|chr1_90074127	2	2	100
chr1	90098948	90098952	Mil2018|chr1_90098950	2	2	100
chr1	90123050	90123054	Mil2015|chr1_90123052	2	2	100
chr1	90140411	90140415	Kar2015|chr1_90140413	2	2	100
chr1	90144878	90144882	Mil2015|chr1_90144880	2	2	100
chr1	90159207	90159211	Mil2015|chr1_90159209	2	2	100
chr1	90243010	90243014	Mil2015|chr1_90243012	2	2	100
chr1	90263297	90263301	Mil2015|chr1_90263299	2	2	100
chr1	90274739	90274743	Mil2015|chr1_90274741	2	2	100
chr1	90302916	90302920	Kar2015|chr1_90302918	2	2	100
chr1	90316218	90316222	Kar2015|chr1_90316220	2	2	100
chr1	90339358	90339362	Mil2015|chr1_90339360	2	2	100
chr1	90353663	90353667	Mil2015|chr1_90353665	2	2	100
chr1	90397615	90397619	Mil2015|chr1_90397617	2	2	100
chr1	90435441	90435445	Kar2015|chr1_90435443	2	2	100
chr1	90459379	90459383	Mil2015|chr1_90459381	2	2	100
chr1	90537398	90537402	Mil2015|chr1_90537400	2	2	100
chr1	90728003	90728007	Kar2015|chr1_90728005	2	2	100
chr1	90980751	90980755	Kar2015|chr1_90980753	2	2	100
chr1	91015754	91015758	Kar2015|chr1_91015756	2	2	100
chr1	91052361	91052365	Mil2015|chr1_91052363	2	2	100
chr1	91063565	91063569	Mil2015|chr1_91063567	2	2	100
chr1	91123226	91123230	Kar2015|chr1_91123228	2	2	100
chr1	91130368	91130372	Kar2015|chr1_91130370	2	2	100
chr1	91155733	91155737	Kar2015|chr1_91155735	2	2	100
chr1	91204324	91204328	Mil2015|chr1_91204326	2	2	100
chr1	91235045	91235049	Mil2015|chr1_91235047	2	2	100
chr1	91383075	91383079	Kar2015|chr1_91383077	2	2	100
chr1	91493121	91493125	Kar2015|chr1_91493123	2	2	100
chr1	91759708	91759712	Mil2015|chr1_91759710	2	2	100
chr1	91814948	91814952	Kar2015|chr1_91814950	2	2	100
chr1	91889785	91889789	Mil2015|chr1_91889787	2	2	100
chr1	91925985	91925989	Mil2015|chr1_91925987	2	2	100
chr1	92193306	92193310	Mil2015|chr1_92193308	2	2	100
chr1	92205767	92205771	Mil2015|chr1_92205769	2	2	100
chr1	92272126	92272130	Kar2015|chr1_92272128	2	2	100
chr1	92329741	92329745	Mil2015|chr1_92329743	2	2	100
chr1	92428225	92428229	Kar2015|chr1_92428227	2	2	100
chr1	92499722	92499726	Mil2015|chr1_92499724	2	2	100
chr1	92514431	92514435	Kar2015|chr1_92514433	2	2	100
chr1	92632467	92632471	Mil2015|chr1_92632469	2	2	100
chr1	92688653	92688657	Kar2015|chr1_92688655	2	2	100
chr1	92727527	92727531	Mil2015|chr1_92727529	2	2	100
chr1	92761189	92761193	Mil2015|chr1_92761191	2	2	100
chr1	92780970	92780974	Mil2015|chr1_92780972	2	2	100
chr1	92806612	92806616	Mil2015|chr1_92806614	2	2	100
chr1	92892268	92892272	Mil2013_shared|chr1_92892270	2	2	100
chr1	92897304	92897308	Mil2015|chr1_92897306	2	2	100
chr1	92910096	92910100	Mil2015|chr1_92910098	2	2	100
chr1	92923399	92923403	Mil2015|chr1_92923401	2	2	100
chr1	92929164	92929168	Mil2015|chr1_92929166	2	2	100
chr1	93025716	93025720	Kar2015|chr1_93025718	2	2	100
chr1	93076531	93076535	Mil2015|chr1_93076533	2	2	100
chr1	93137210	93137214	Mil2015|chr1_93137212	2	2	100
chr1	93177394	93177398	Kar2015|chr1_93177396	2	2	100
chr1	93202001	93202005	Kar2015|chr1_93202003	2	2	100
chr1	93249967	93249971	Mil2015|chr1_93249969	2	2	100
chr1	93262626	93262630	Mil2015|chr1_93262628	2	2	100
chr1	93302678	93302682	Mil2015|chr1_93302680	2	2	100
chr1	93365763	93365767	Kar2015|chr1_93365765	2	2	100
chr1	93387110	93387114	Mil2015|chr1_93387112	2	2	100
chr1	93458368	93458372	Mil2015|chr1_93458370	2	2	100
chr1	93493090	93493094	Kar2015|chr1_93493092	2	2	100
chr1	93575302	93575306	Kar2015|chr1_93575304	2	2	100
chr1	93582742	93582746	Mil2015|chr1_93582744	2	2	100
chr1	93614336	93614340	Kar2015|chr1_93614338	2	2	100
chr1	93641159	93641163	Mil2015|chr1_93641161	2	2	100
chr1	93648882	93648886	Mil2015|chr1_93648884	2	2	100
chr1	93712831	93712835	Mil2015|chr1_93712833	2	2	100
chr1	93723364	93723368	Mil2015|chr1_93723366	2	2	100
chr1	93766320	93766324	Kar2015|chr1_93766322	2	2	100
chr1	93826469	93826473	Kar2015|chr1_93826471	2	2	100
chr1	93843104	93843108	Mil2015|chr1_93843106	2	2	100
chr1	93857267	93857271	Kar2015|chr1_93857269	2	2	100
chr1	93879881	93879885	Mil2013_shared|chr1_93879883	2	2	100
chr1	93891767	93891771	Kar2015|chr1_93891769	2	2	100
chr1	93913495	93913499	Mil2015|chr1_93913497	2	2	100
chr1	93937552	93937556	Mil2015|chr1_93937554	2	2	100
chr1	93972573	93972577	Mil2015|chr1_93972575	2	2	100
chr1	93986723	93986727	Mil2015|chr1_93986725	2	2	100
chr1	93997138	93997142	Mil2015|chr1_93997140	2	2	100
chr1	94006997	94007001	Kar2015|chr1_94006999	2	2	100
chr1	94210740	94210744	Mil2015|chr1_94210742	2	2	100
chr1	94217186	94217190	Mil2015|chr1_94217188	2	2	100
chr1	94325859	94325863	Mil2015|chr1_94325861	2	2	100
chr1	94337249	94337253	Mil2015|chr1_94337251	2	2	100
chr1	94417370	94417374	Mil2015|chr1_94417372	2	2	100
chr1	94455148	94455152	Mil2015|chr1_94455150	2	2	100
chr1	94501750	94501754	Mil2015|chr1_94501752	2	2	100
chr1	94514322	94514326	Mil2015|chr1_94514324	2	2	100
chr1	94519513	94519517	Mil2018|chr1_94519515	2	2	100
chr1	94551057	94551061	Kar2015|chr1_94551059	2	2	100
chr1	94583583	94583587	Mil2015|chr1_94583585	2	2	100
chr1	94604623	94604627	Kar2015|chr1_94604625	2	2	100
chr1	94620592	94620596	Mil2015|chr1_94620594	2	2	100
chr1	94648085	94648089	Mil2015|chr1_94648087	2	2	100
chr1	94714173	94714177	Mil2015|chr1_94714175	2	2	100
chr1	94724731	94724735	Mil2015|chr1_94724733	2	2	100
chr1	94736792	94736796	Mil2015|chr1_94736794	2	2	100
chr1	94751633	94751637	Mil2015|chr1_94751635	2	2	100
chr1	94800475	94800479	Kar2015|chr1_94800477	2	2	100
chr1	94844190	94844194	Mil2015|chr1_94844192	2	2	100
chr1	94869974	94869978	Mil2015|chr1_94869976	2	2	100
chr1	94932259	94932263	Mil2015|chr1_94932261	2	2	100
chr1	95040346	95040350	Kar2015|chr1_95040348	2	2	100
chr1	95044211	95044215	Mil2013_RM|chr1_95044213	2	2	100
chr1	95214180	95214184	Kar2015|chr1_95214182	2	2	100
chr1	95249233	95249237	Kar2015|chr1_95249235	2	2	100
chr1	95387285	95387289	Mil2015|chr1_95387287	2	2	100
chr1	95404518	95404522	Mil2015|chr1_95404520	2	2	100
chr1	95420953	95420957	Mil2015|chr1_95420955	2	2	100
chr1	95428326	95428330	Kar2015|chr1_95428328	2	2	100
chr1	95453942	95453946	Kar2015|chr1_95453944	2	2	100
chr1	95524065	95524069	Kar2015|chr1_95524067	2	2	100
chr1	95528513	95528517	Kar2015|chr1_95528515	2	2	100
chr1	95546933	95546937	Kar2015|chr1_95546935	2	2	100
chr1	95564164	95564168	Kar2015|chr1_95564166	2	2	100
chr1	95584637	95584641	Kar2015|chr1_95584639	2	2	100
chr1	95593633	95593637	Mil2015|chr1_95593635	2	2	100
chr1	95650762	95650766	Mil2015|chr1_95650764	2	2	100
chr1	95672149	95672153	Mil2015|chr1_95672151	2	2	100
chr1	95685760	95685764	Kar2015|chr1_95685762	2	2	100
chr1	95715745	95715749	Kar2015|chr1_95715747	2	2	100
chr1	95721394	95721398	Mil2015|chr1_95721396	2	2	100
chr1	95773107	95773111	Kar2015|chr1_95773109	2	2	100
chr1	95912093	95912097	Kar2015|chr1_95912095	2	2	100
chr1	95920100	95920104	Mil2015|chr1_95920102	2	2	100
chr1	95923468	95923472	Mil2013_shared|chr1_95923470	2	2	100
chr1	95939577	95939581	Kar2015|chr1_95939579	2	2	100
chr1	96106497	96106501	Kar2015|chr1_96106499	2	2	100
chr1	96129448	96129452	Mil2015|chr1_96129450	2	2	100
chr1	96154606	96154610	Mil2015|chr1_96154608	2	2	100
chr1	96186753	96186757	Kar2015|chr1_96186755	2	2	100
chr1	96276845	96276849	Mil2013_shared|chr1_96276847	2	2	100
chr1	96282485	96282489	Mil2013_NBR|chr1_96282487	2	2	100
chr1	96312913	96312917	Kar2015|chr1_96312915	2	2	100
chr1	96320679	96320683	Mil2018|chr1_96320681	2	2	100
chr1	96327231	96327235	Kar2015|chr1_96327233	2	2	100
chr1	96402409	96402413	Mil2015|chr1_96402411	2	2	100
chr1	96461356	96461360	Mil2015|chr1_96461358	2	2	100
[truncated: 48,001 more rows]
